# Supplementary material for: Unraveling Antimicrobial Resistance Genes and Phenotype Patterns among Enterococcus faecalis Isolated from Retail Chicken Products in Japan
Source: PubMed Central journal article supplement (PMC4363150; doi:10.1371/journal.pone.0121189), 2015-03-17

**ant6 : ant6|(Intercept)**

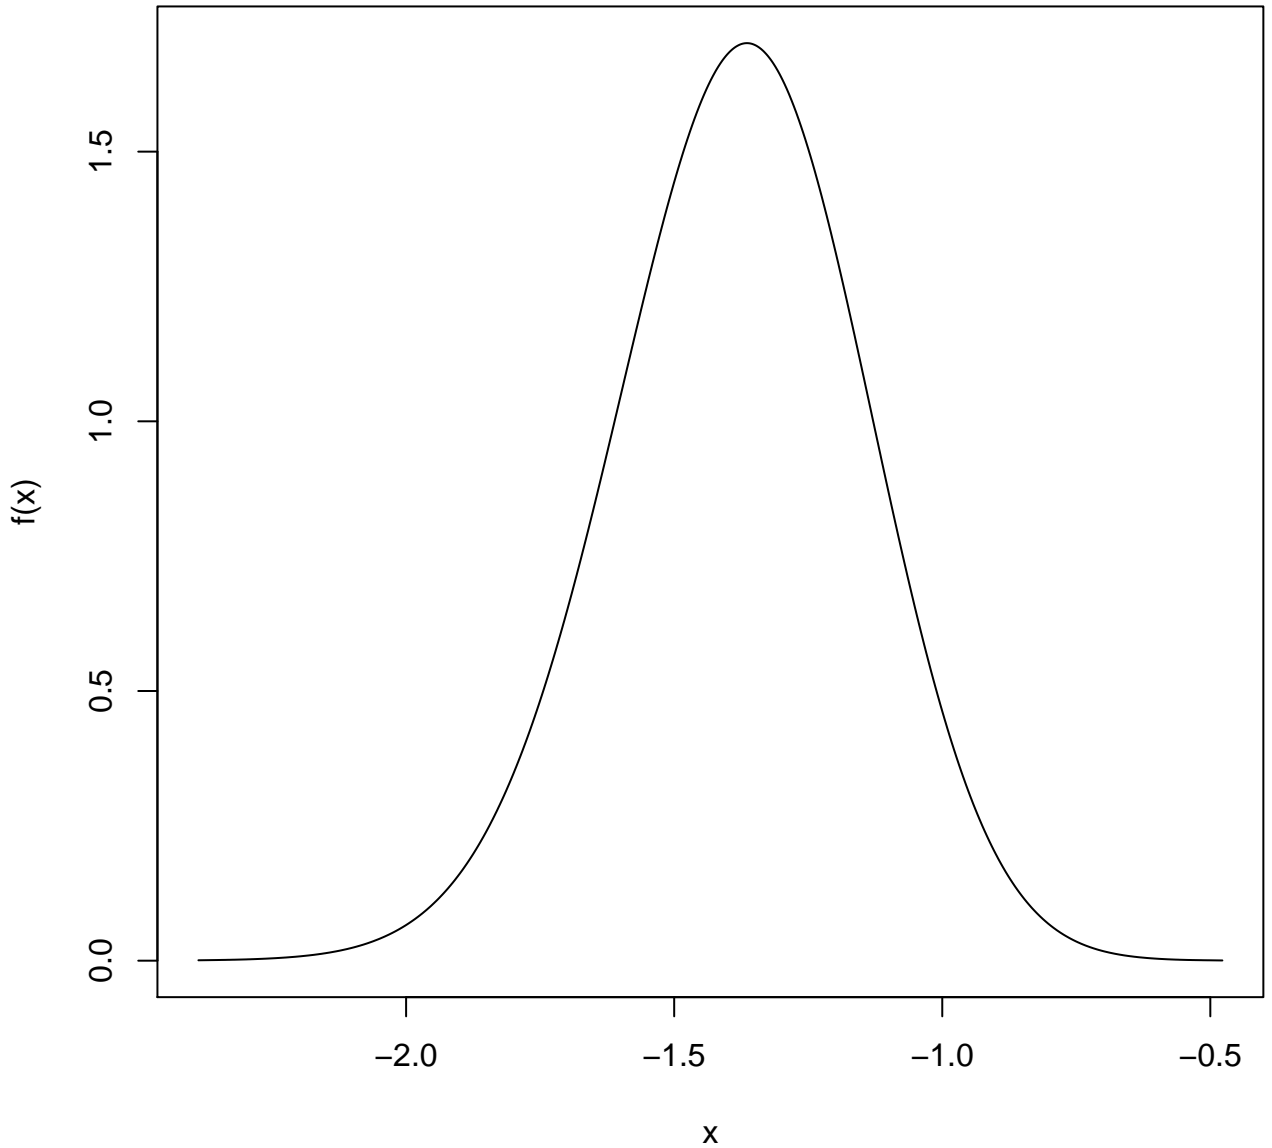

**aph3 : aph3|(Intercept)**

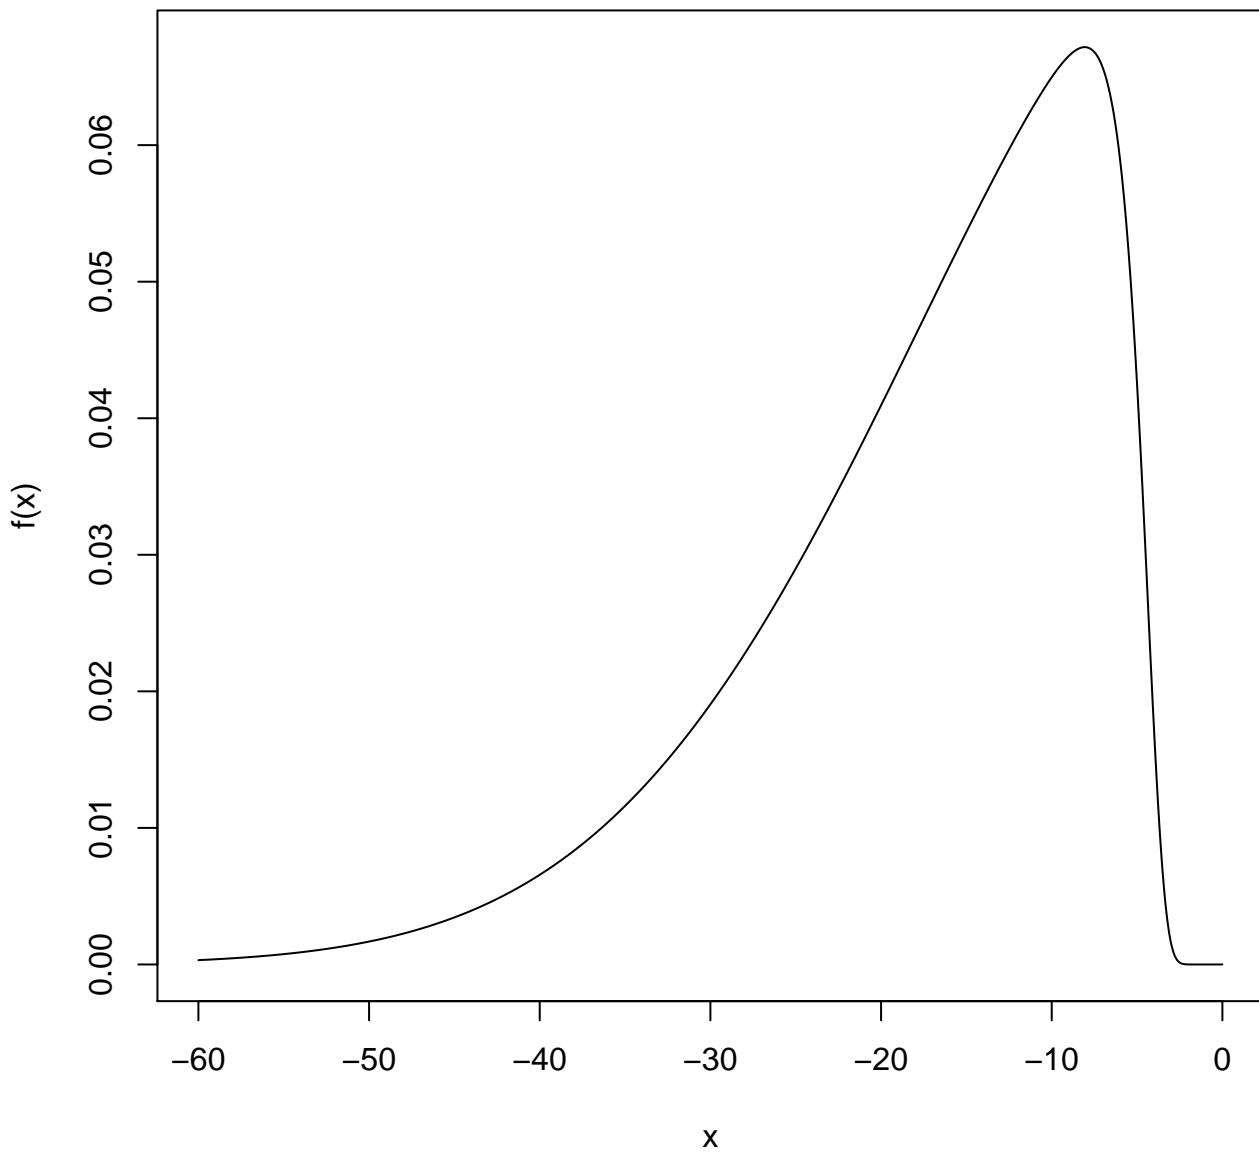

**aph3 : aph3|ant6**

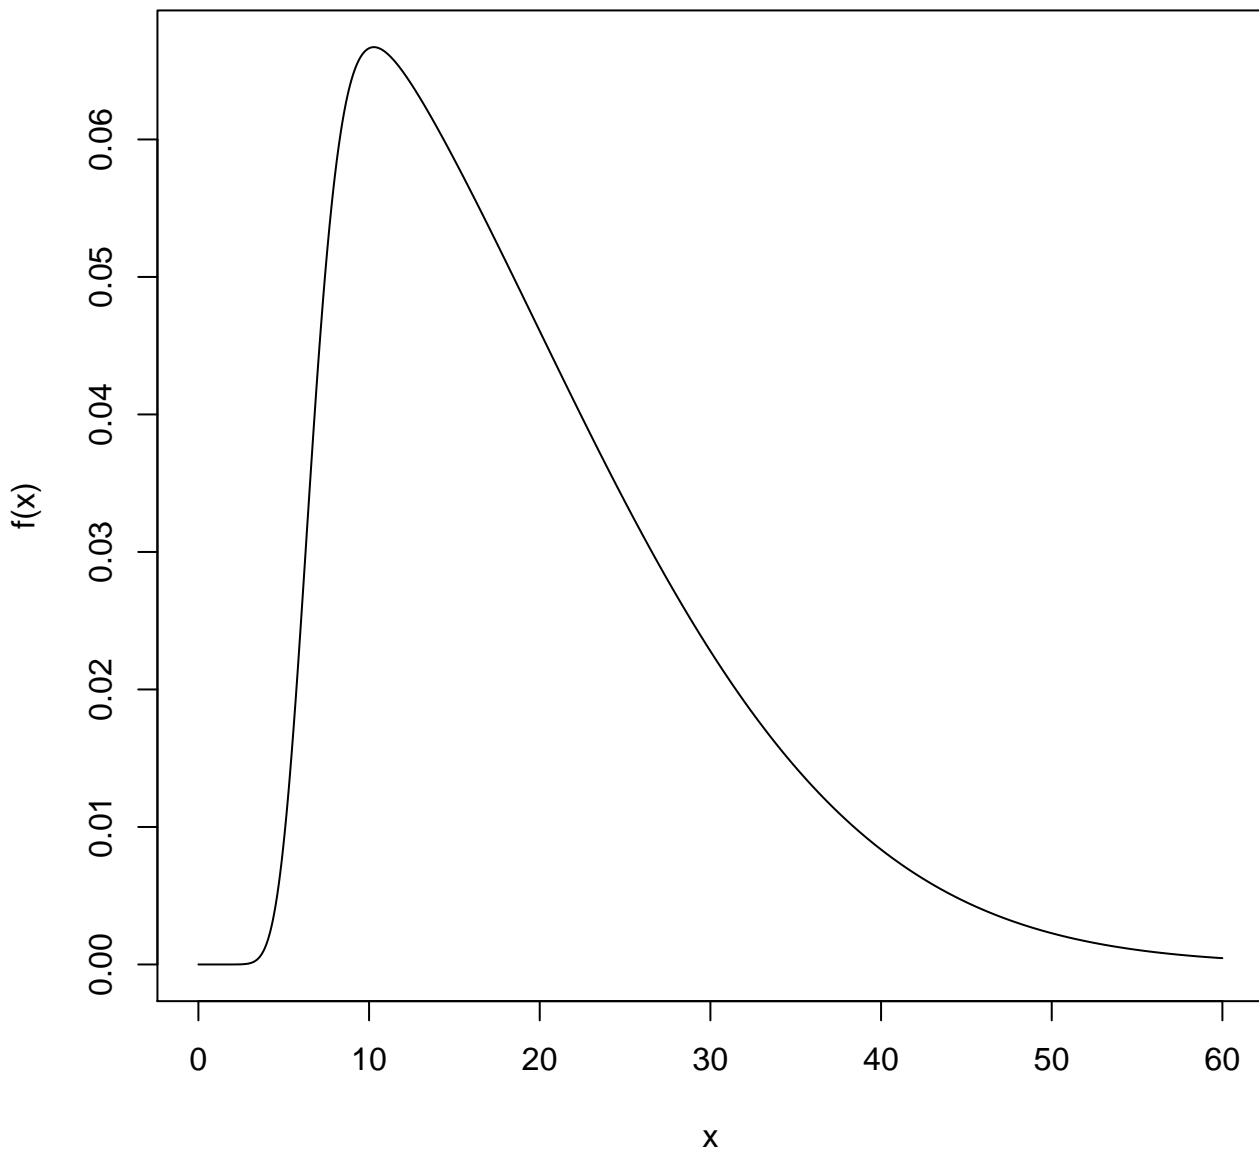

**aph3 : aph3|ermb**

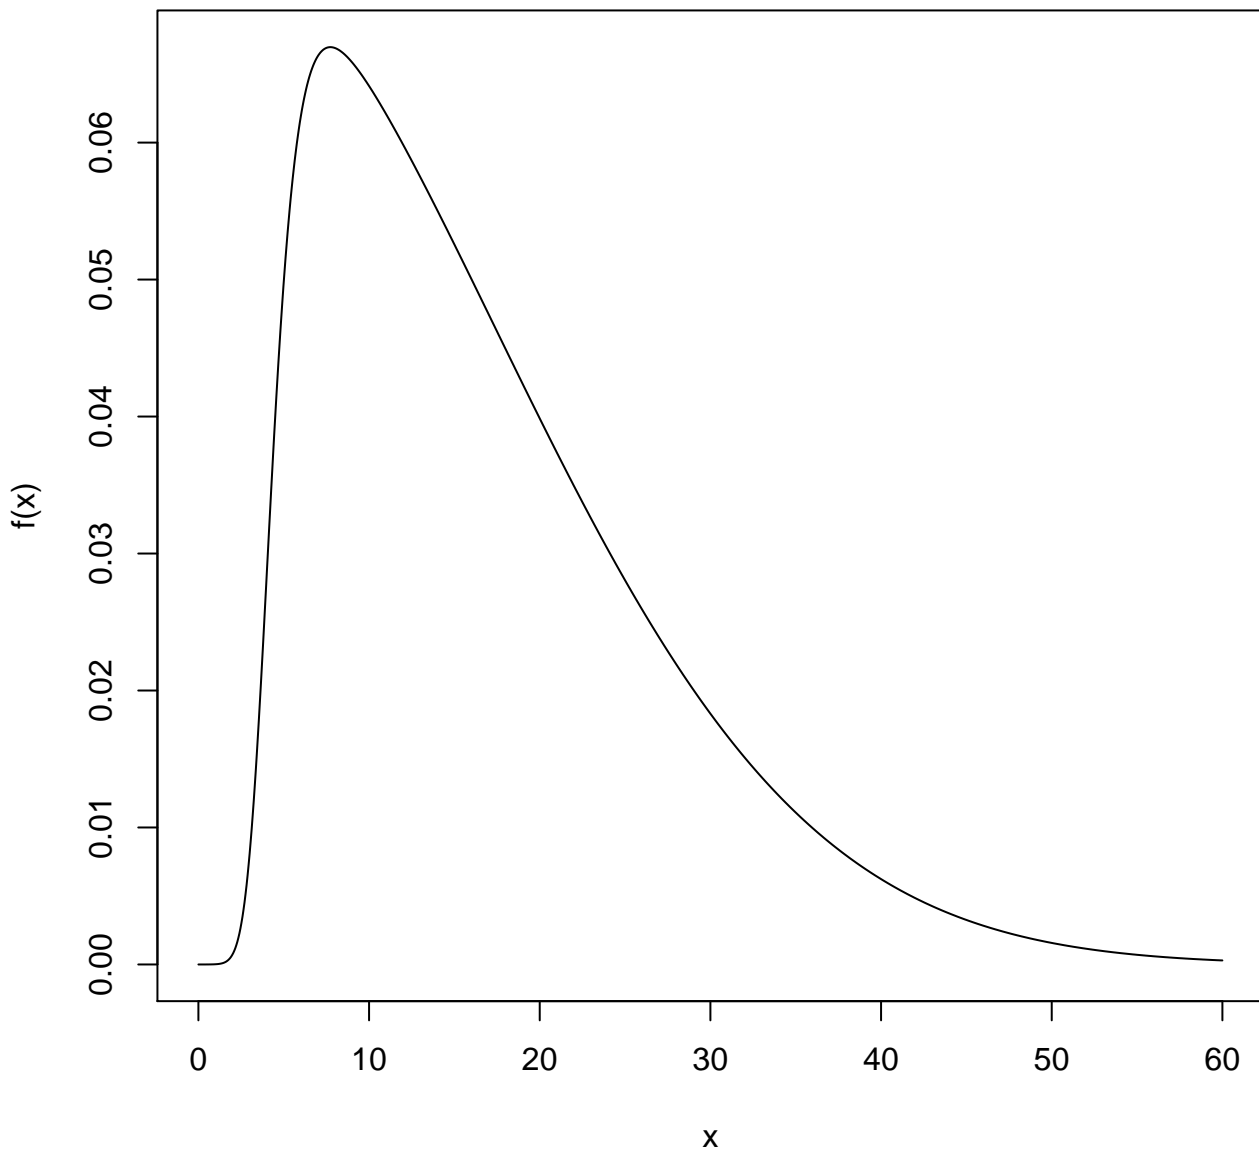

**ermb : ermb|(Intercept)**

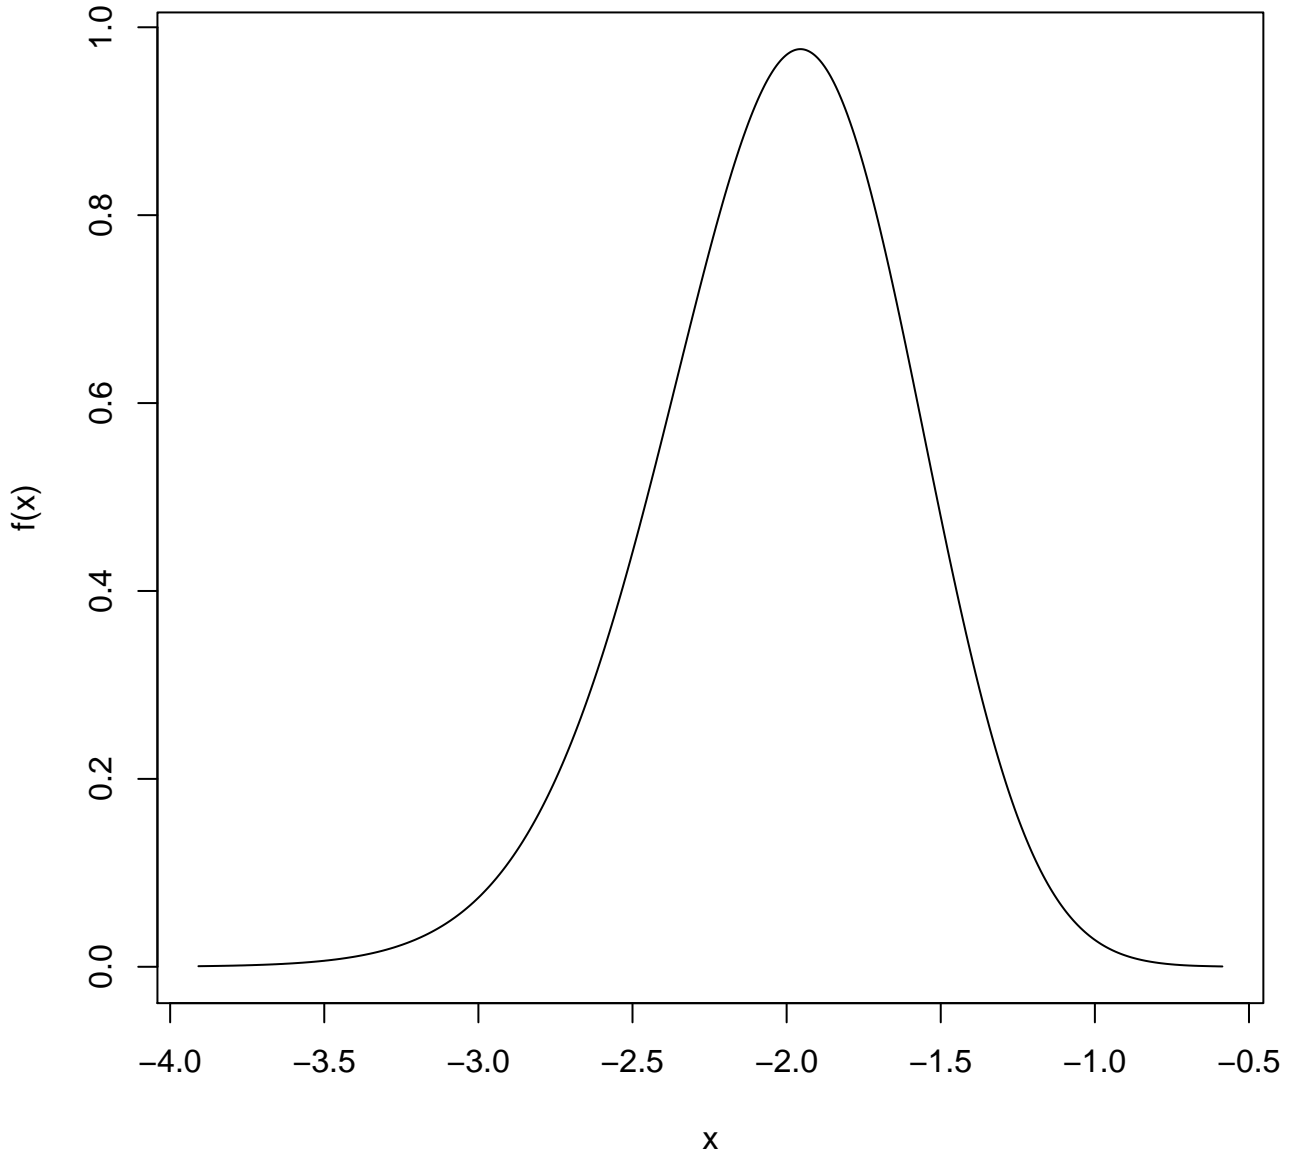

**ermb : ermb|teto**

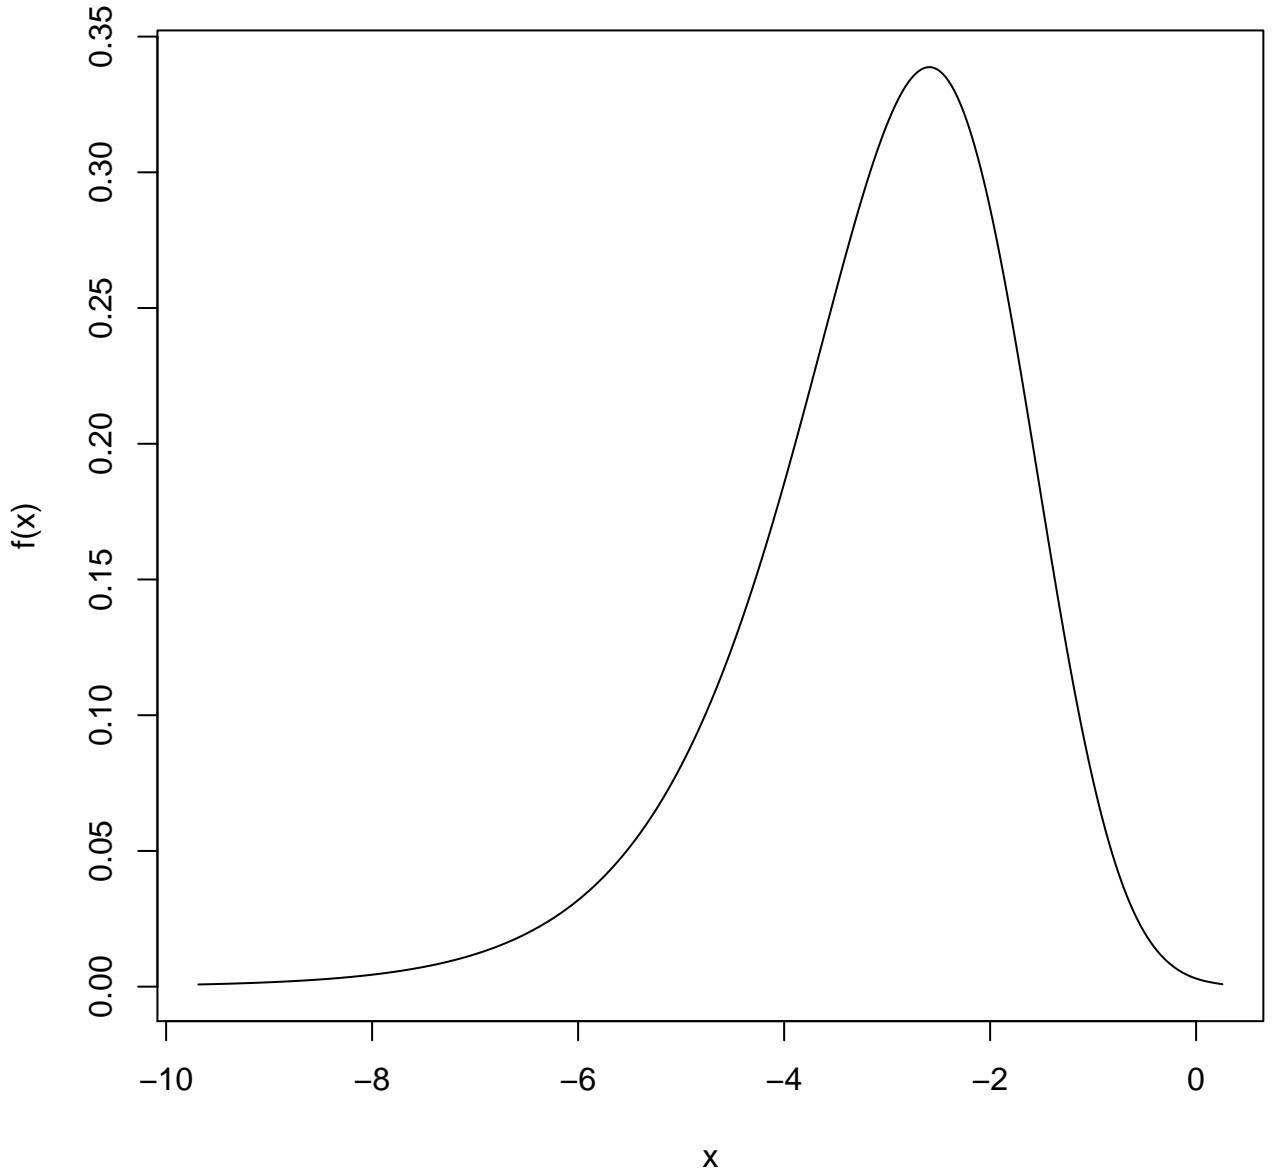

**ermb : ermb|tetl**

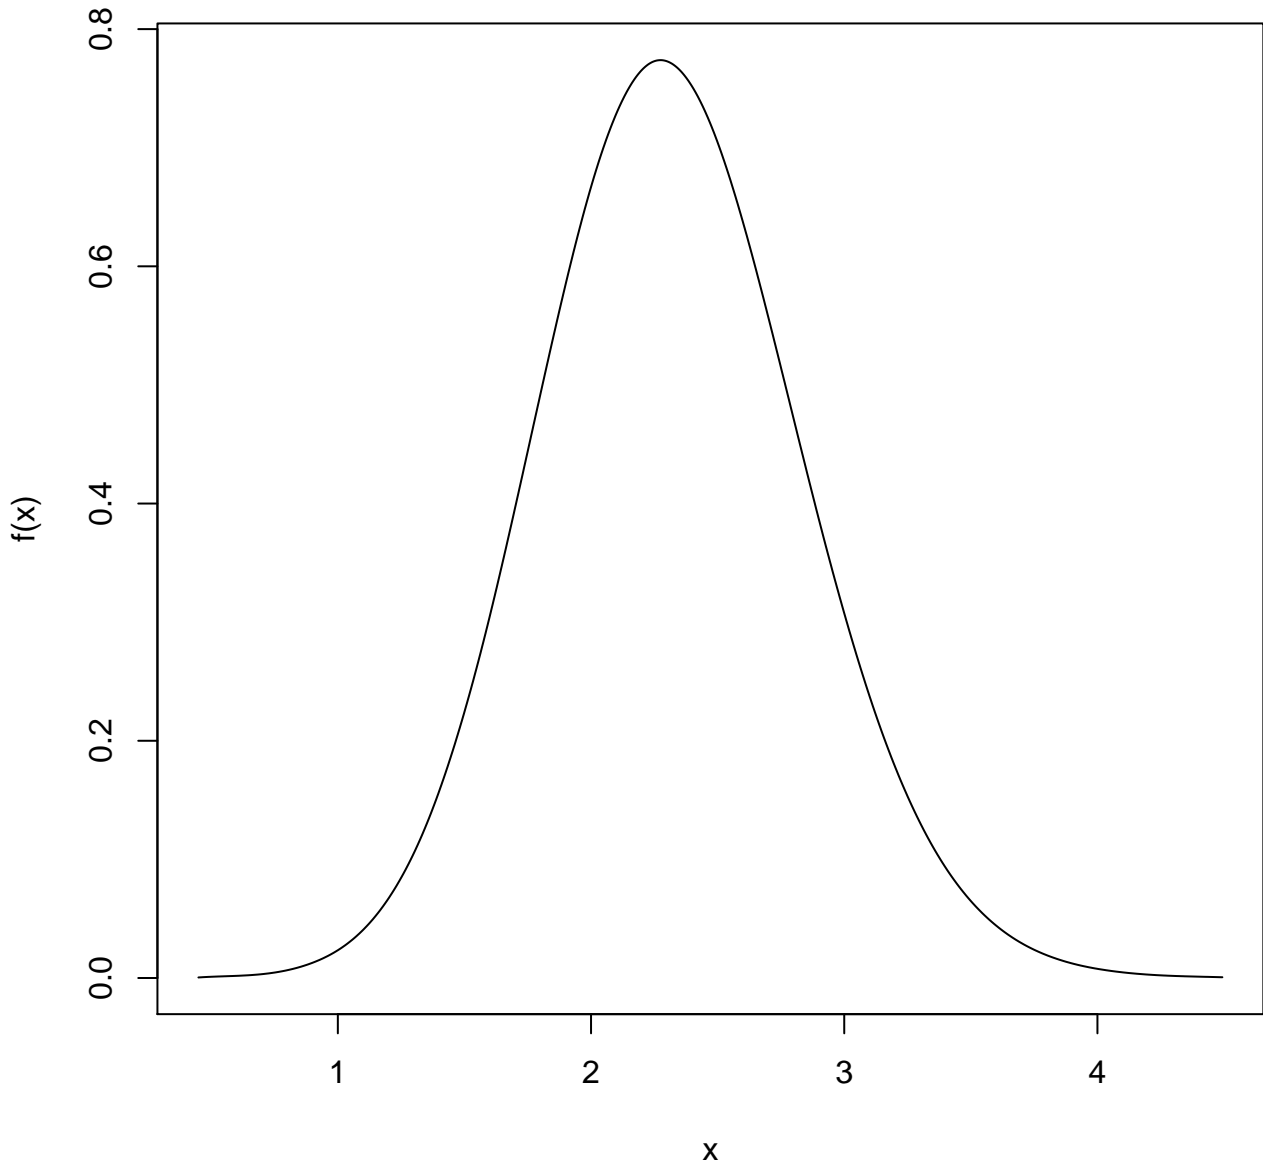

**tetm : tetm|(Intercept)**

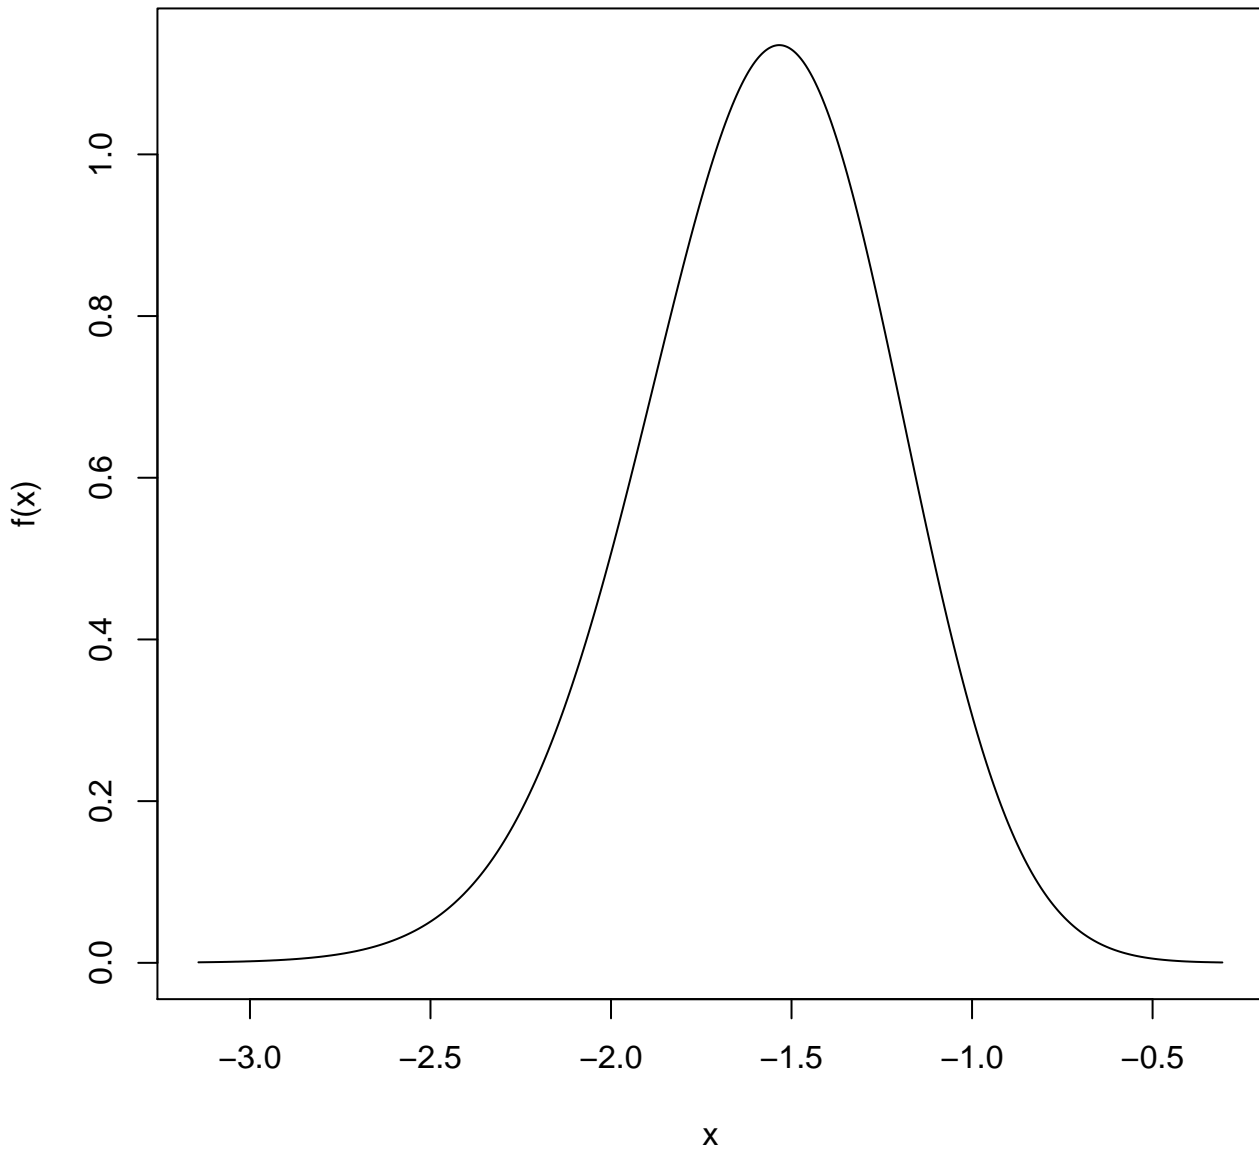



tetm : tetm|teto

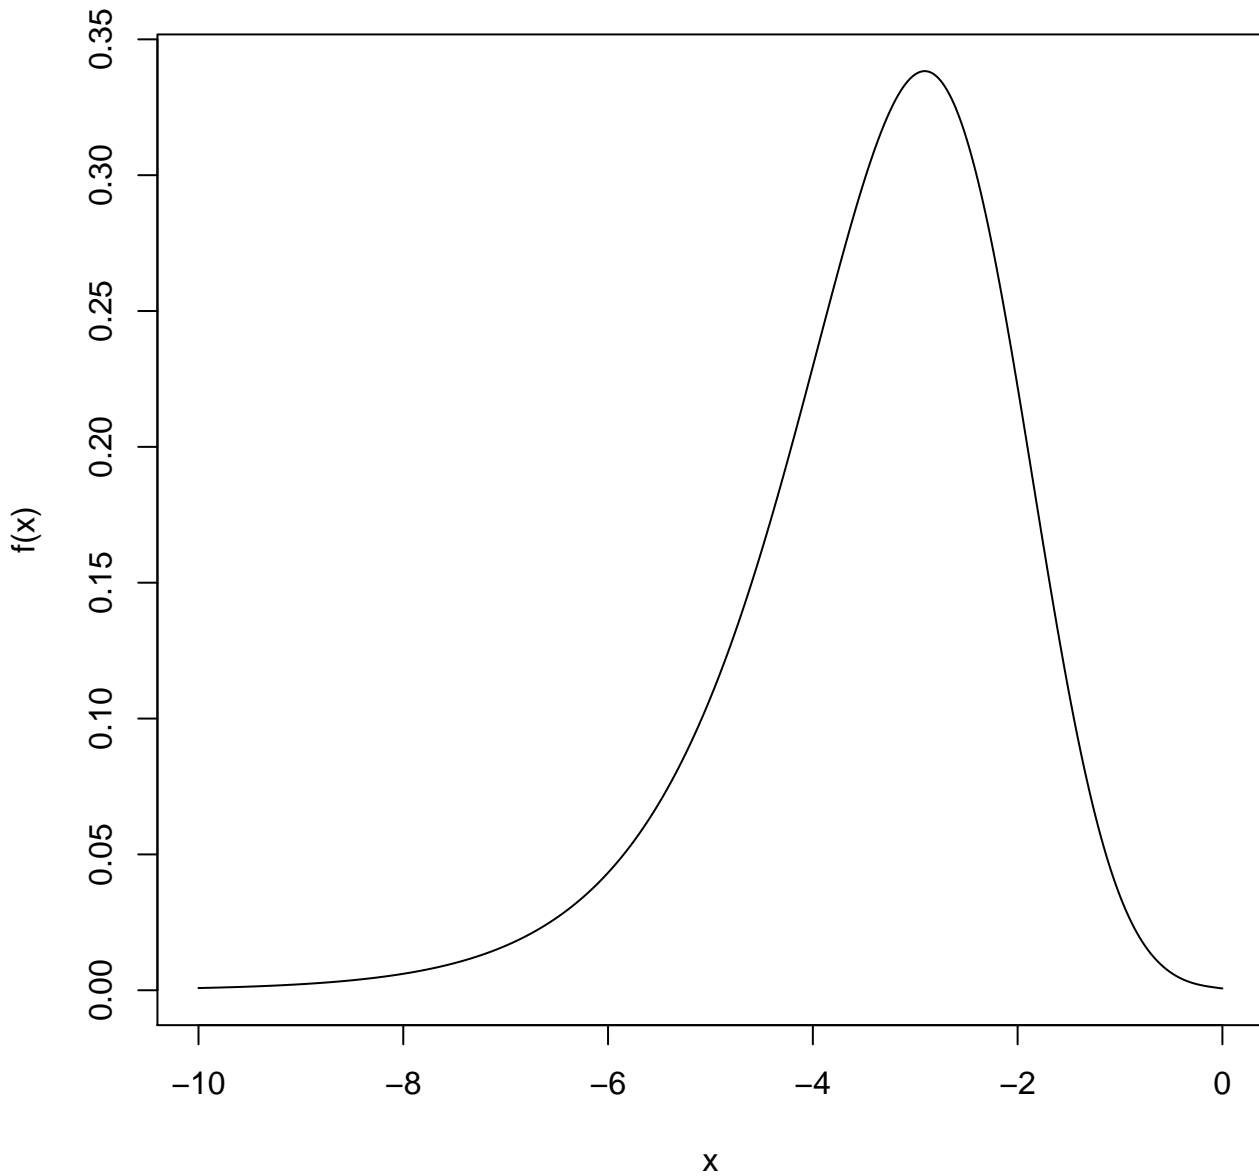

**tetm : tetm|tetl**

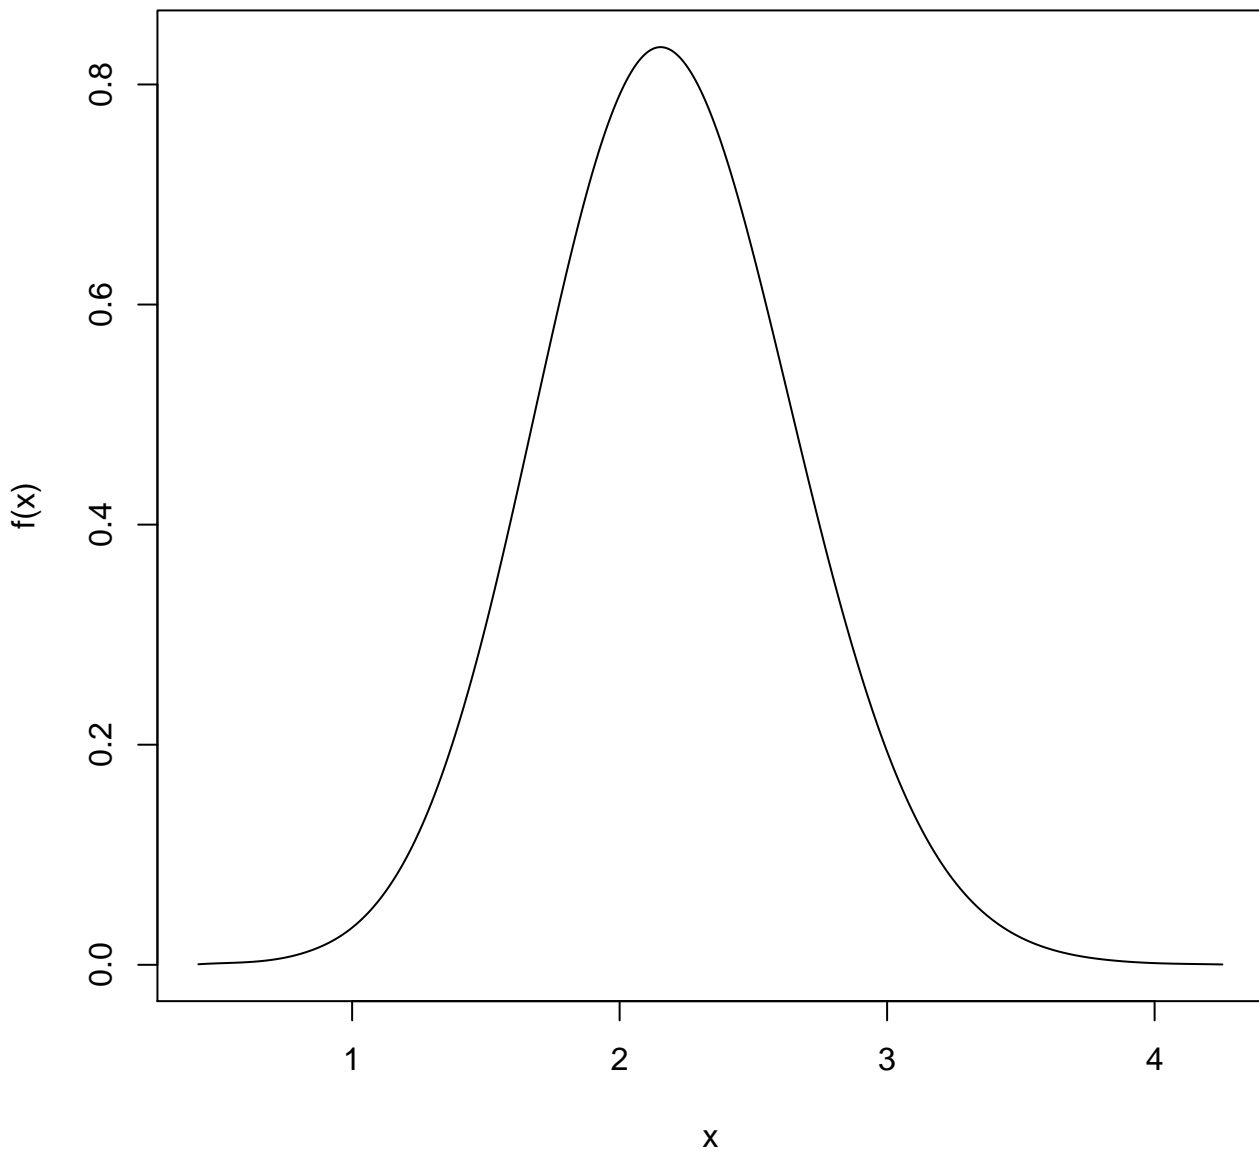

teto : teto|(Intercept)

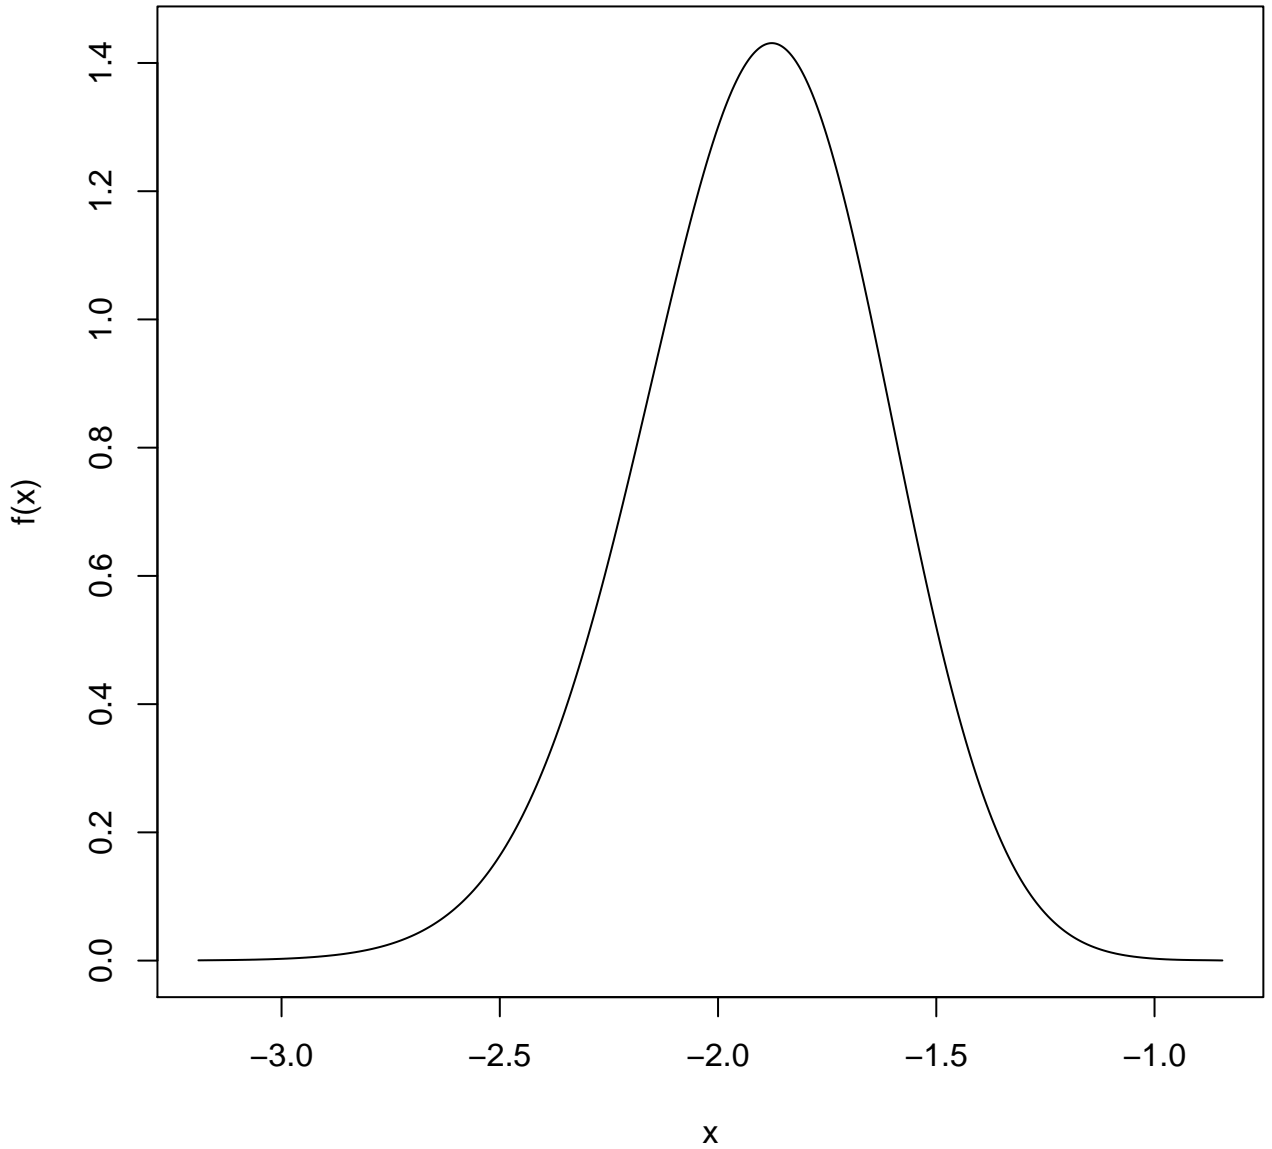

**tet1 : tet1|(Intercept)**

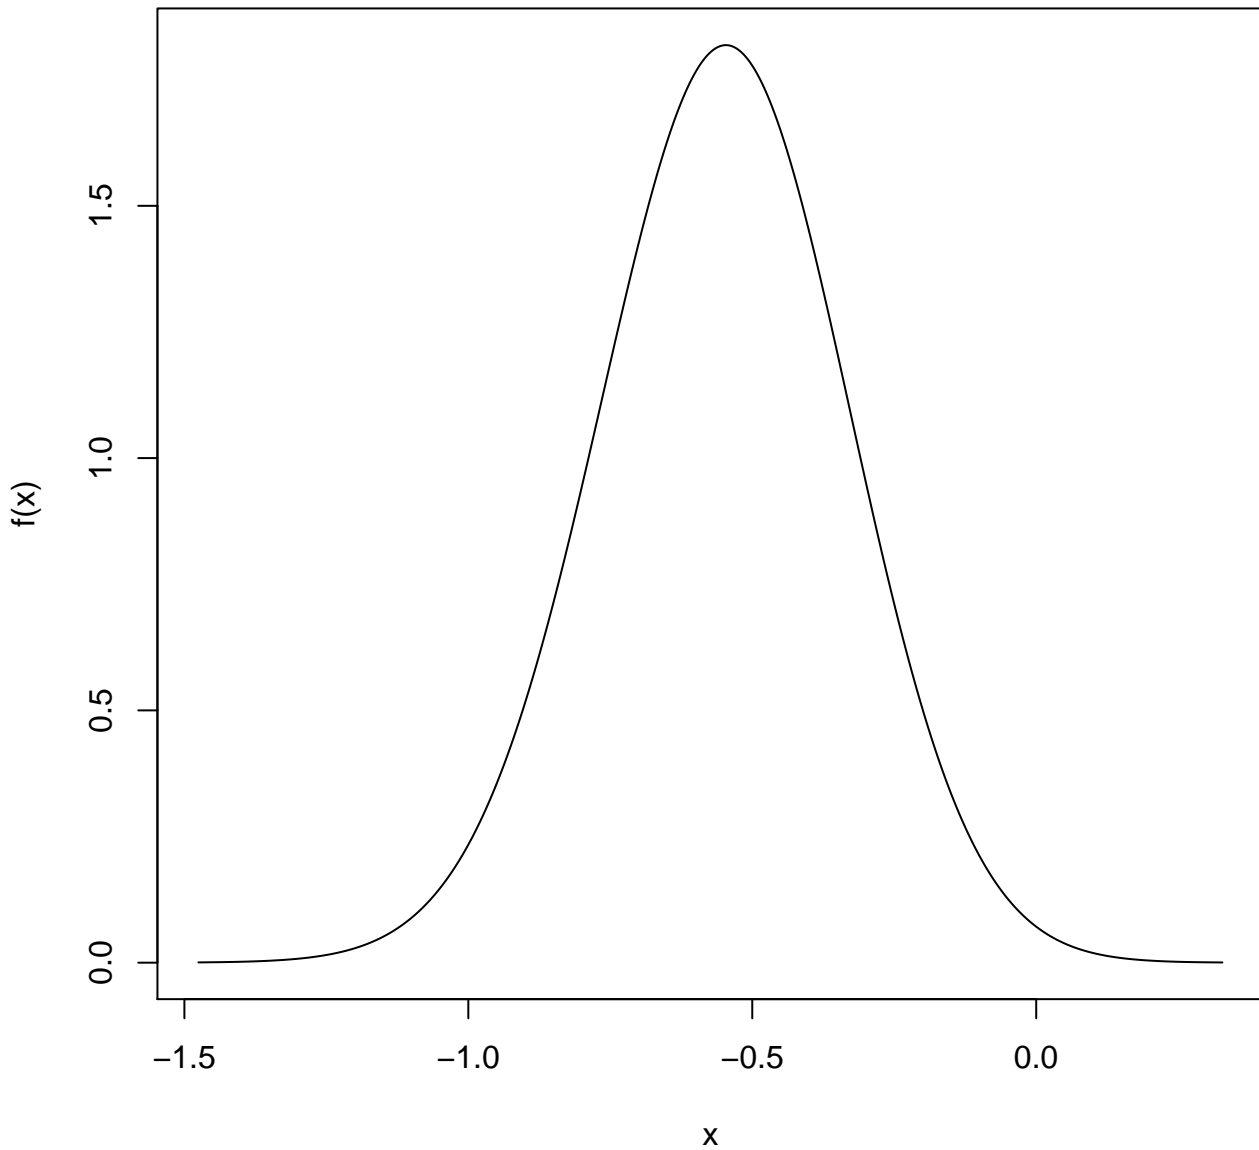

**tetl : tetl|ant6**

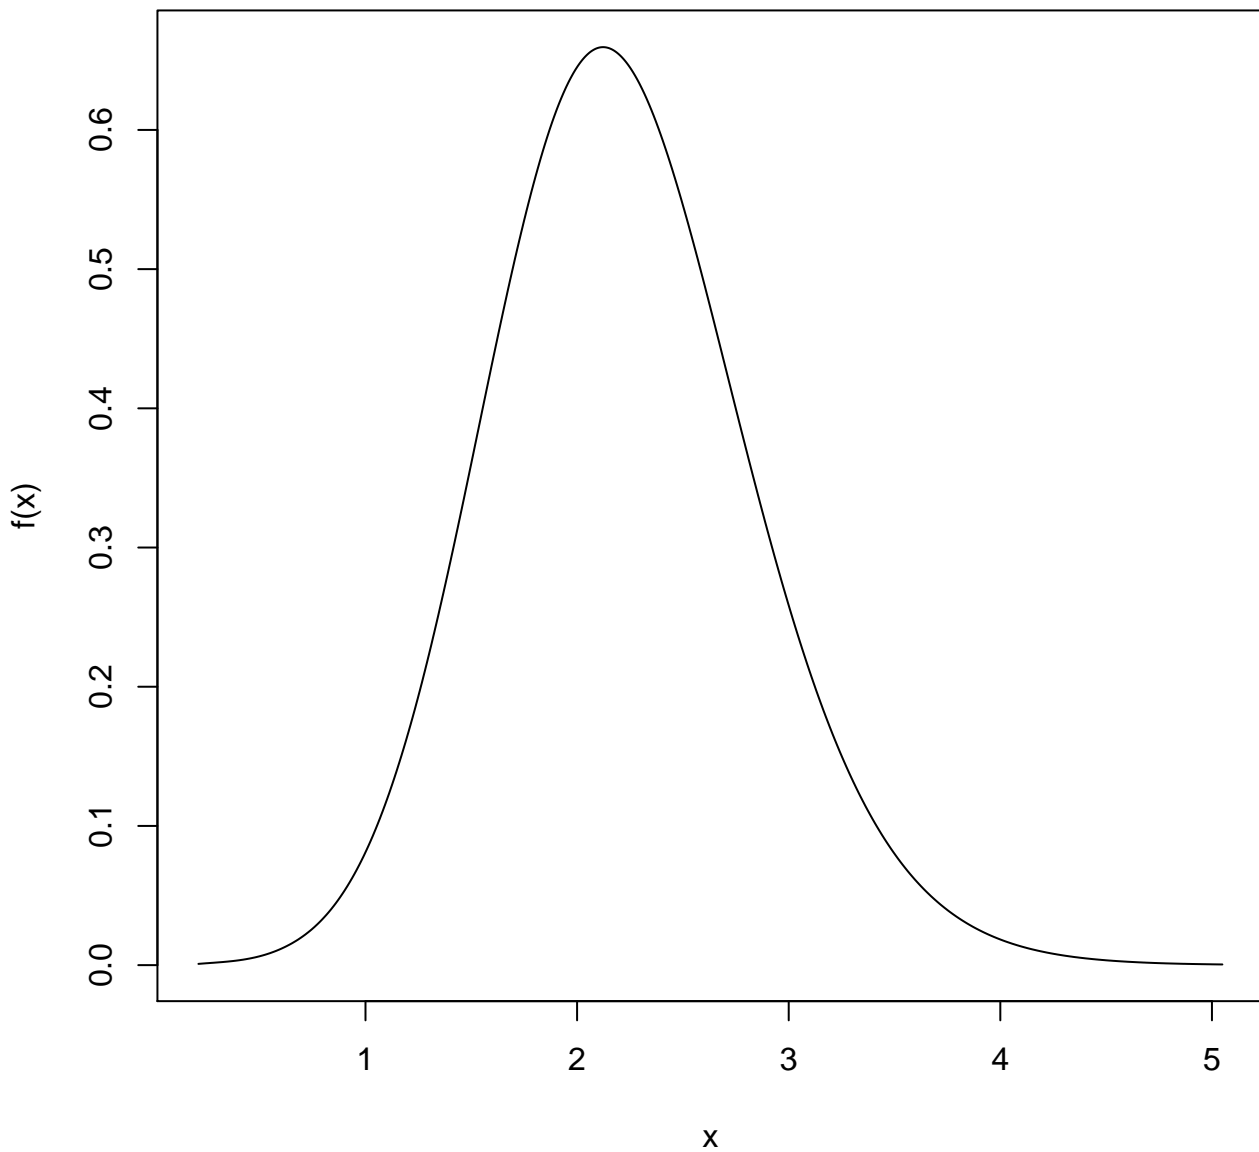

**DSM\_L : DSM\_L|(Intercept)**

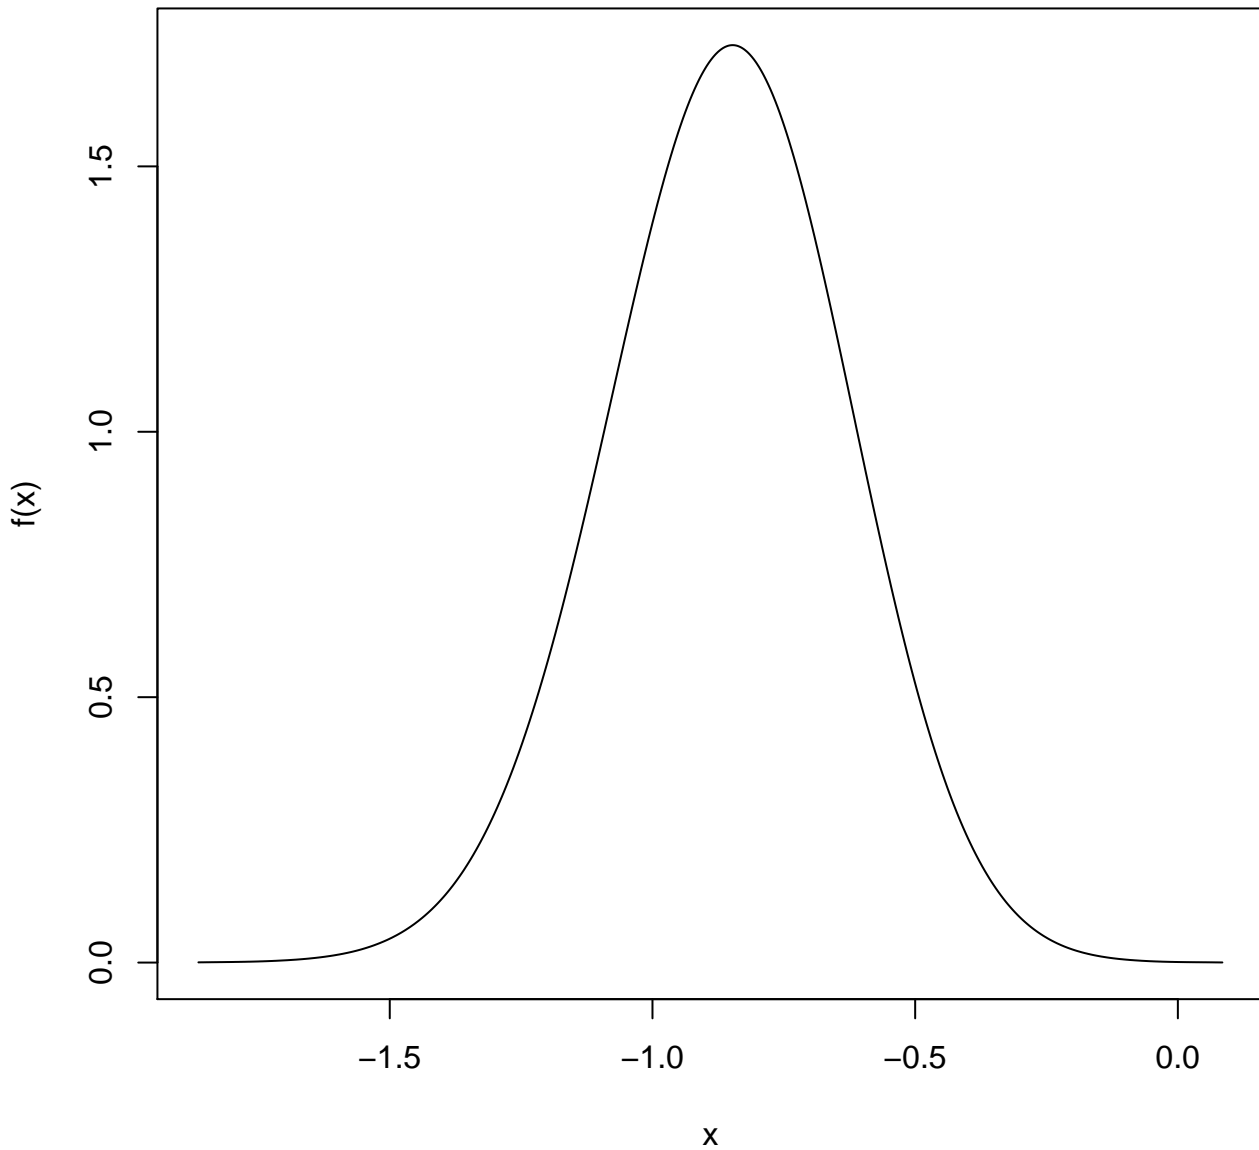

# DSM\_L : DSM\_L|ant6

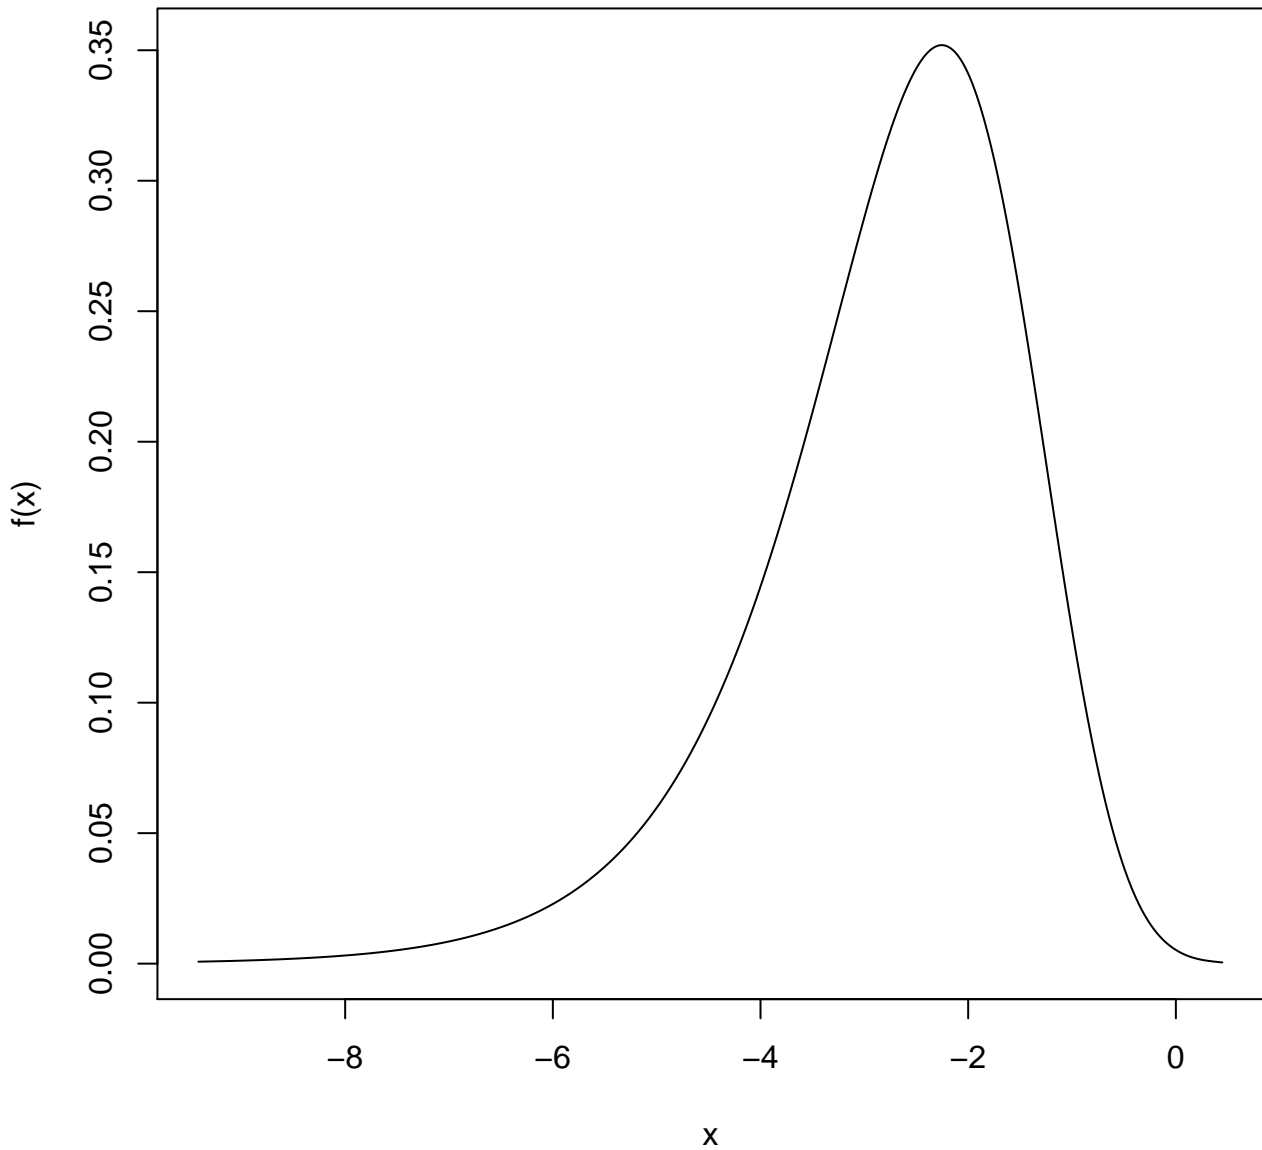

# DSM\_H : DSM\_H|(Intercept)

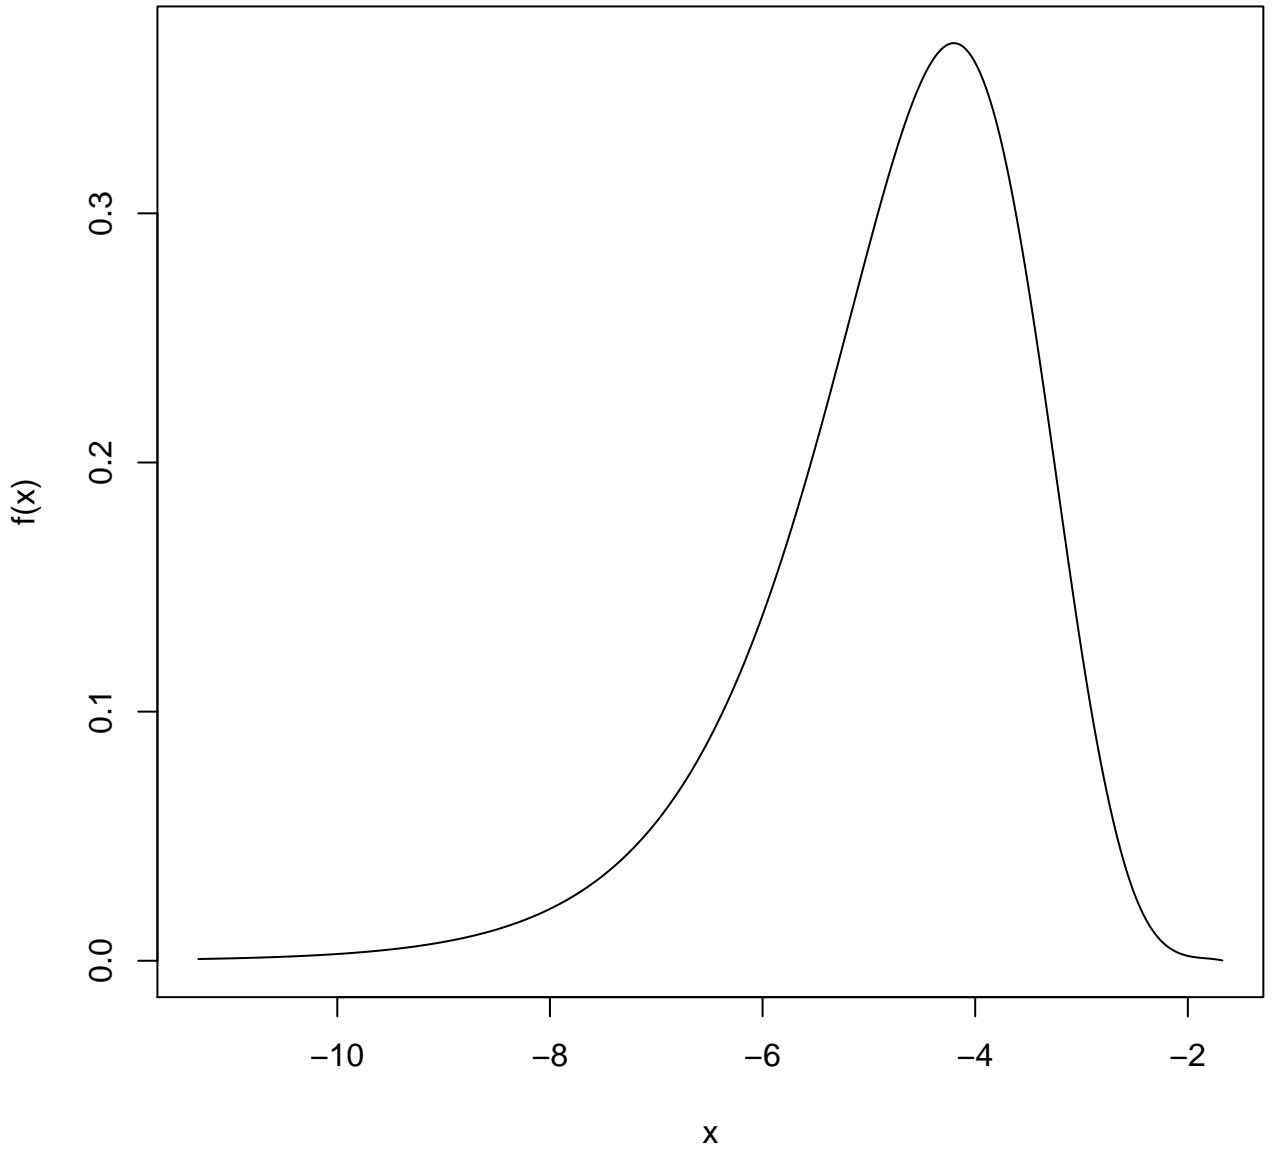



# DSM\_H : DSM\_H|ant6

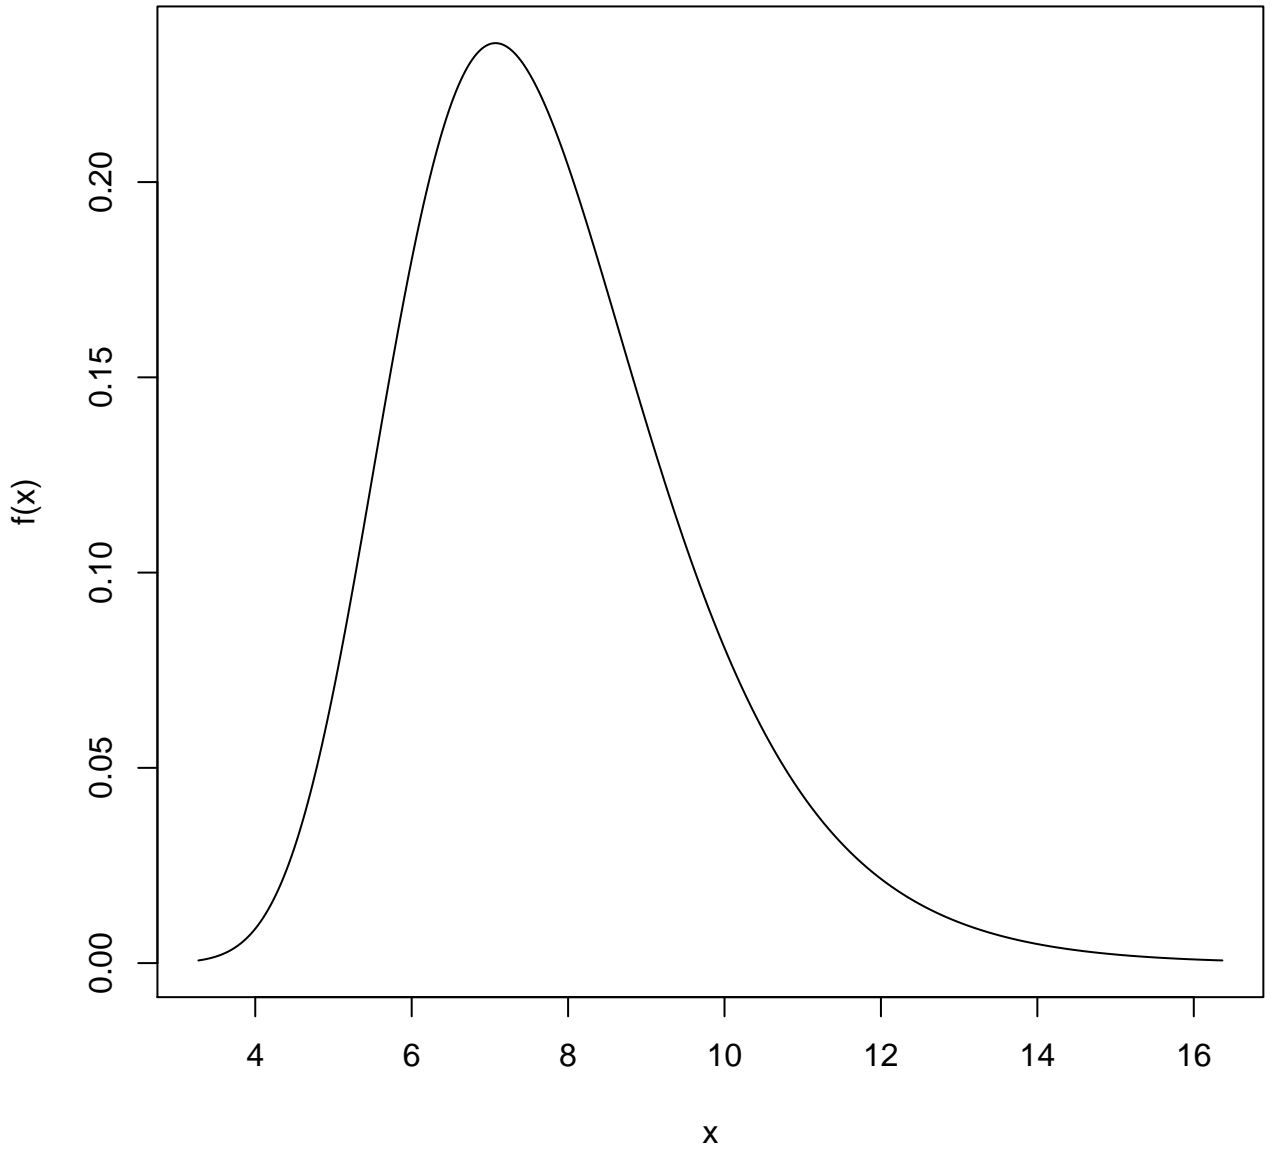

# DSM\_H : DSM\_H|tetm

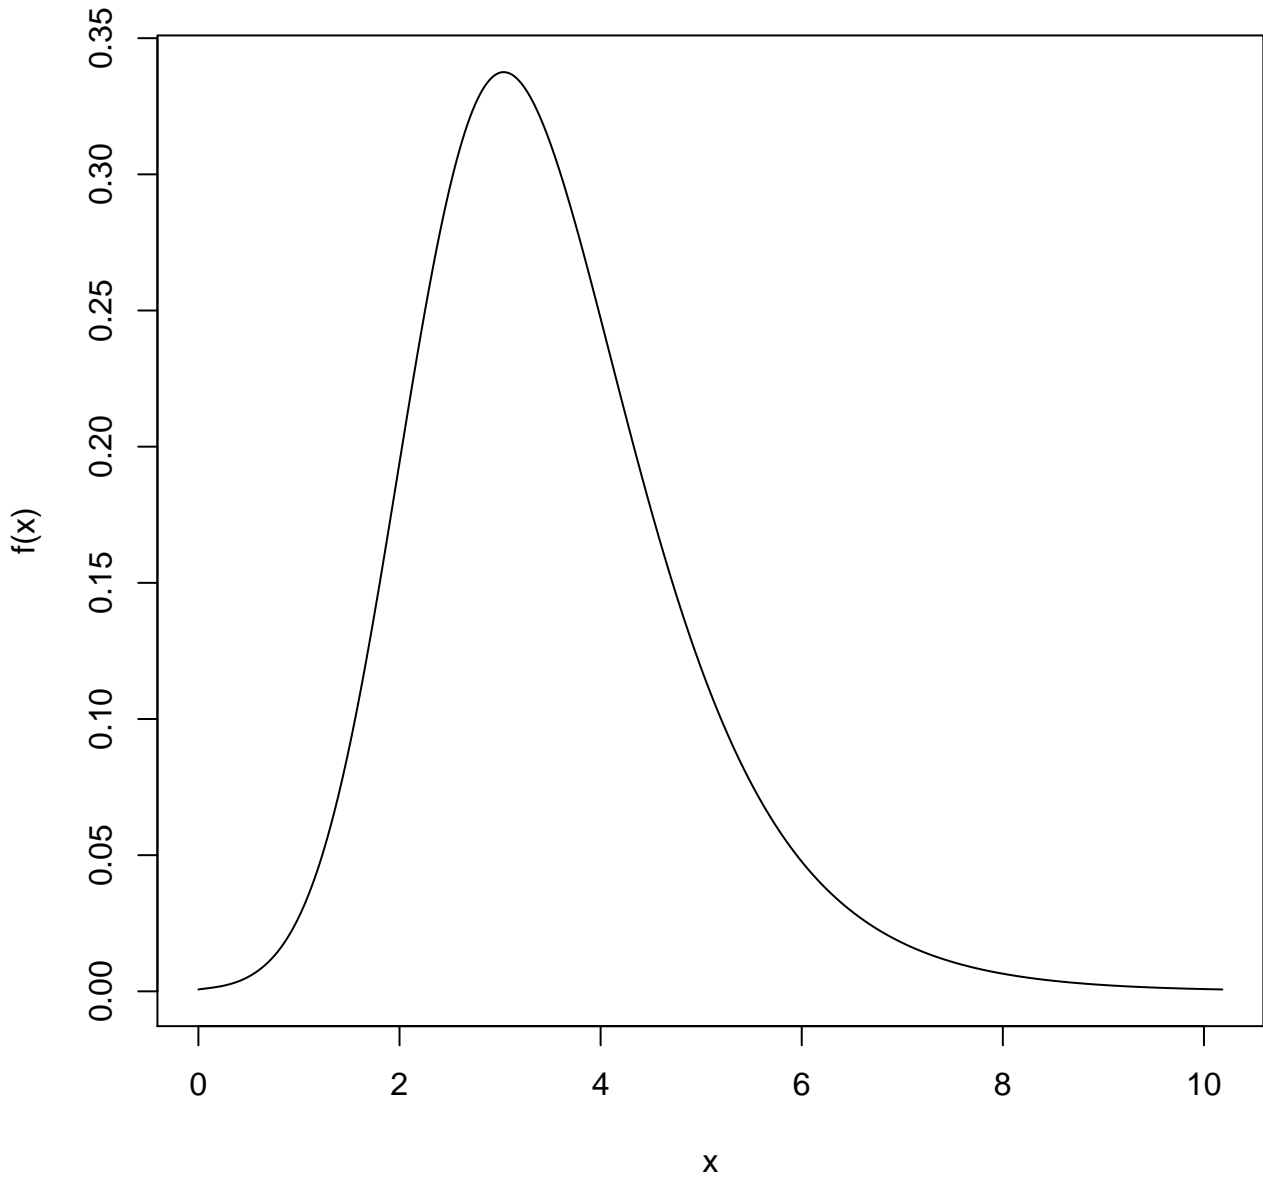

# EM : EM|(Intercept)

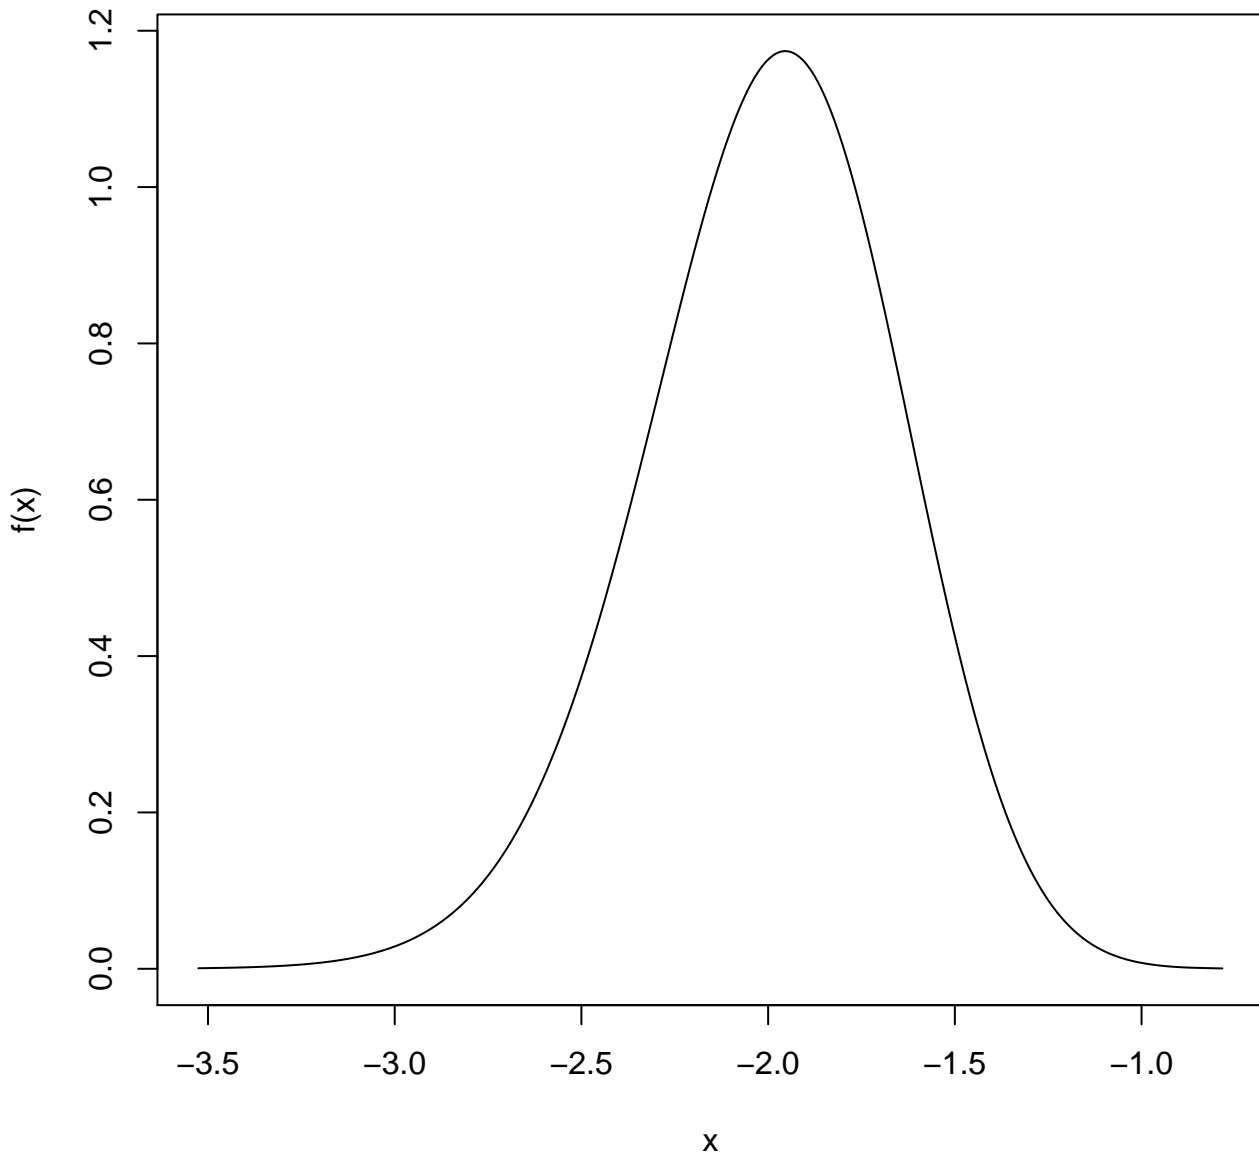

# EM : EM|ermb

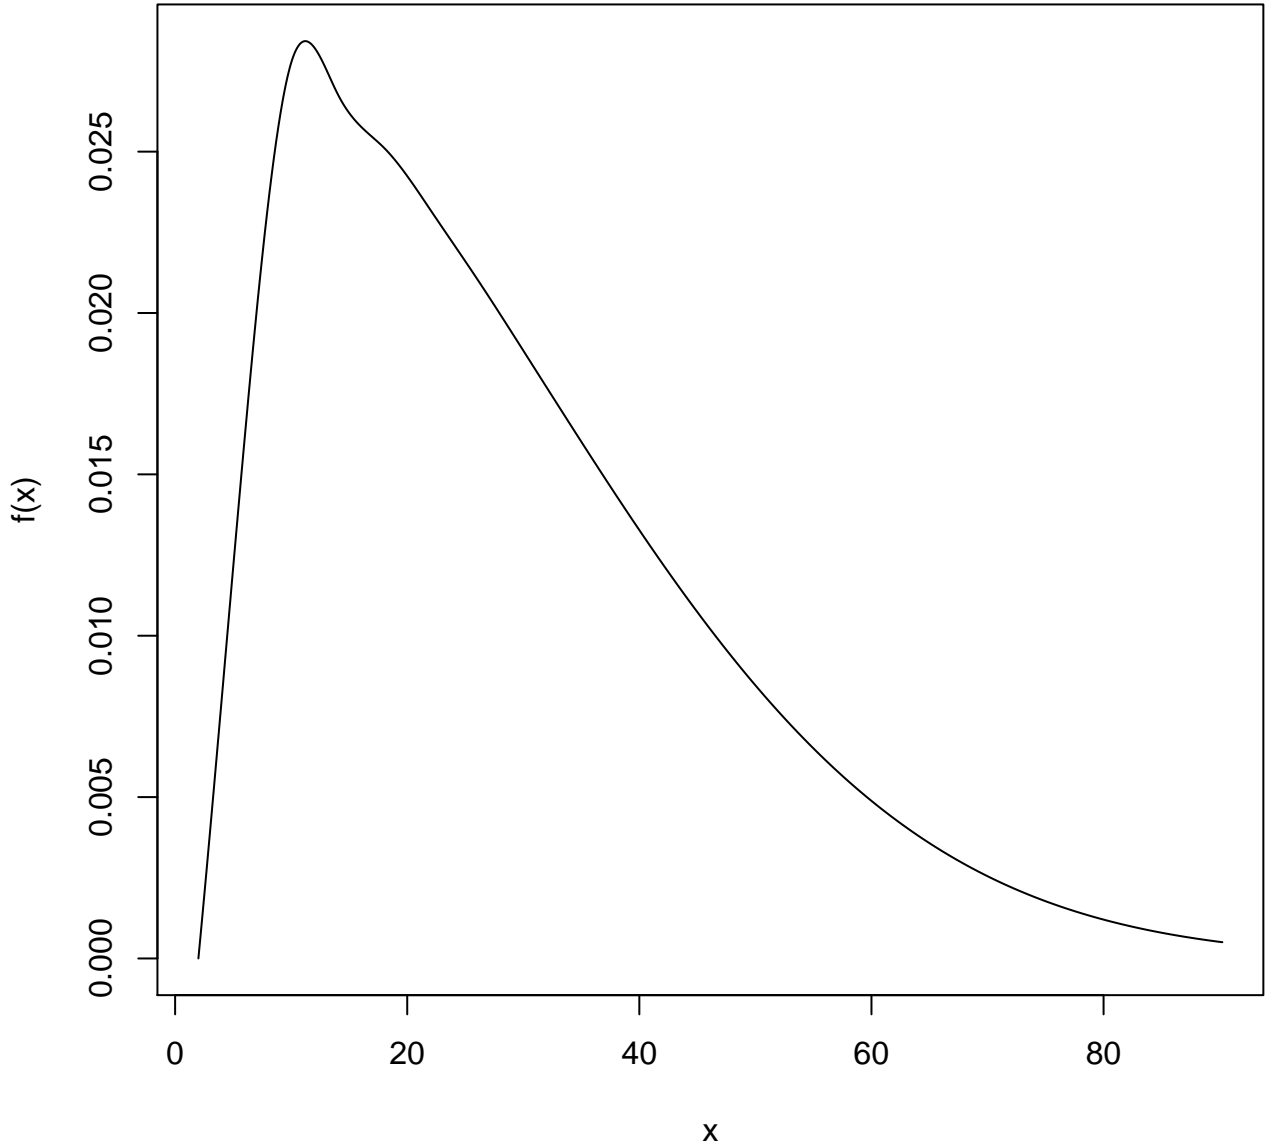

**OTC\_L : OTC\_L|(Intercept)**

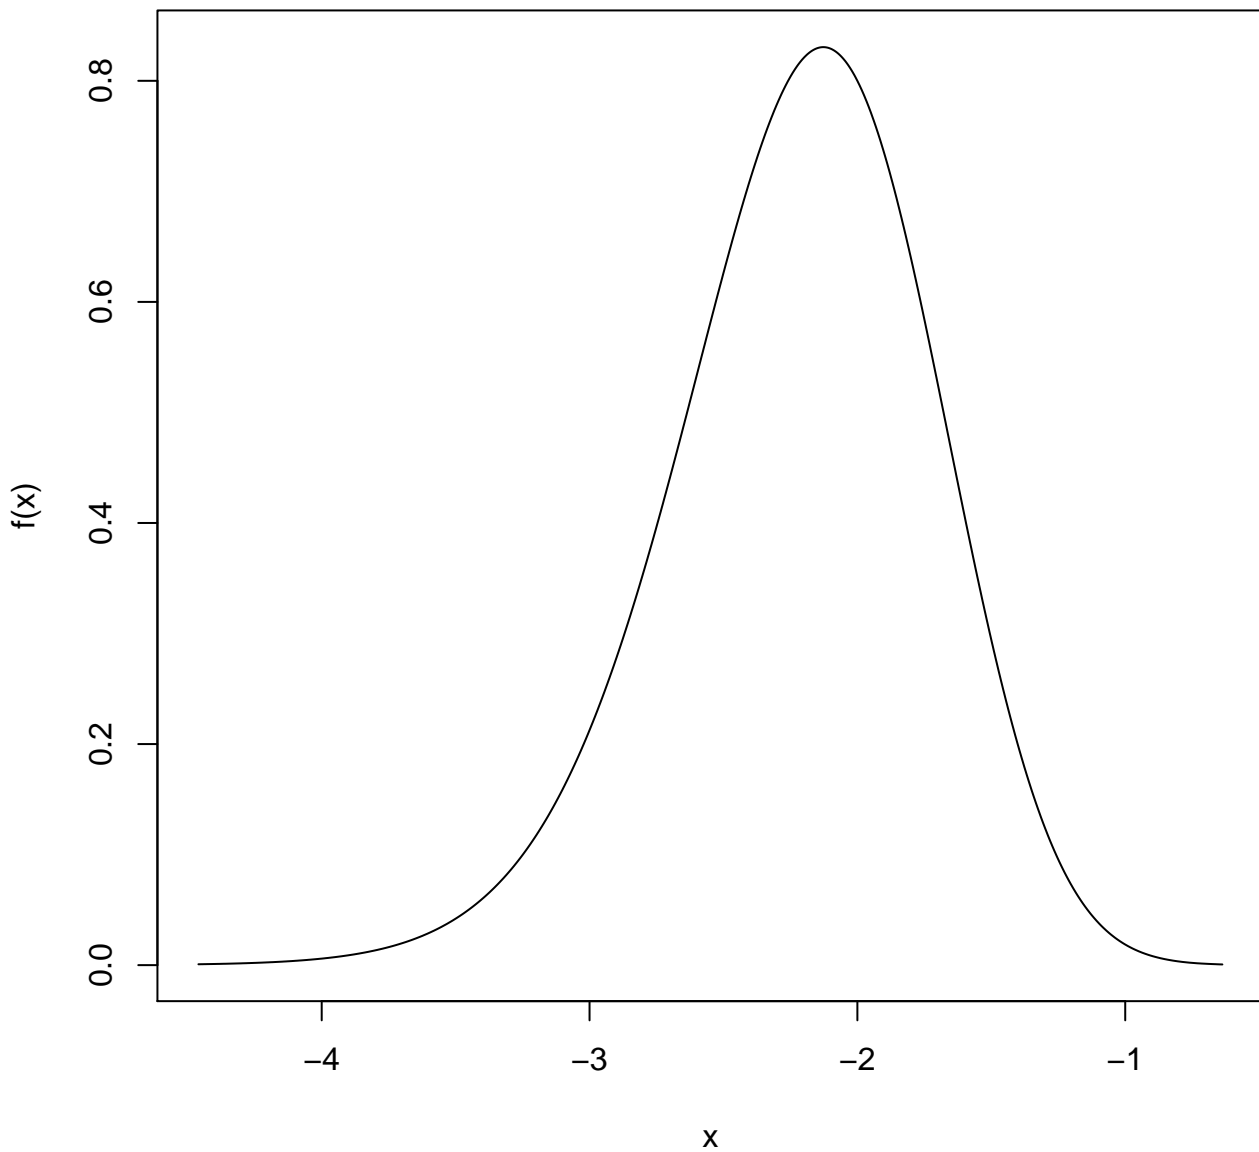

# OTC\_L : OTC\_L|tetm

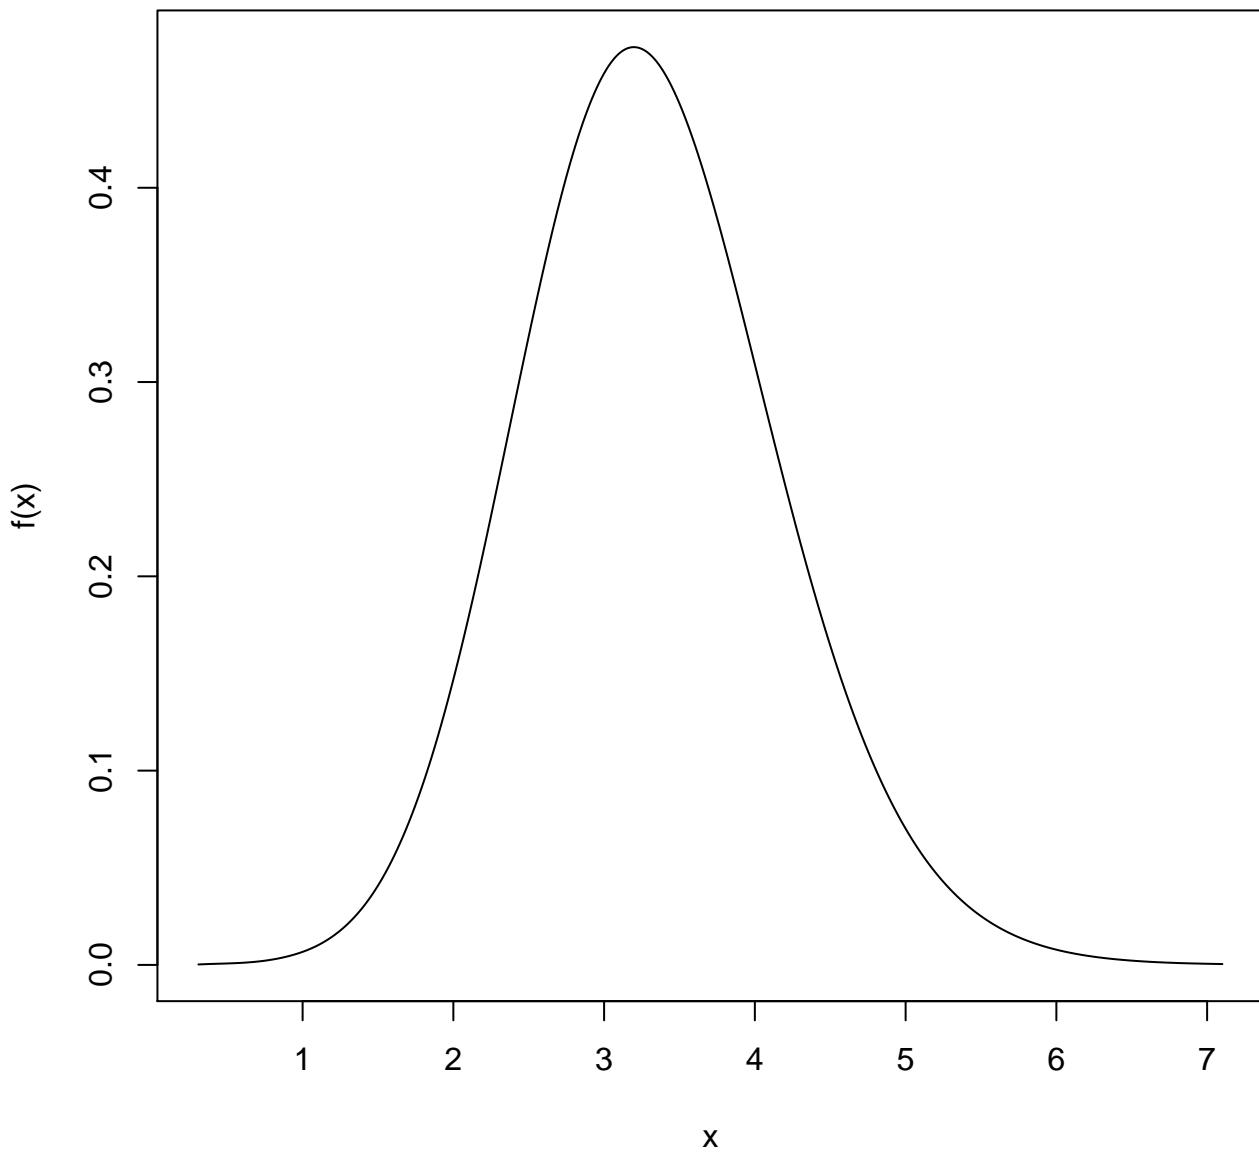

# OTC\_L : OTC\_L|teto

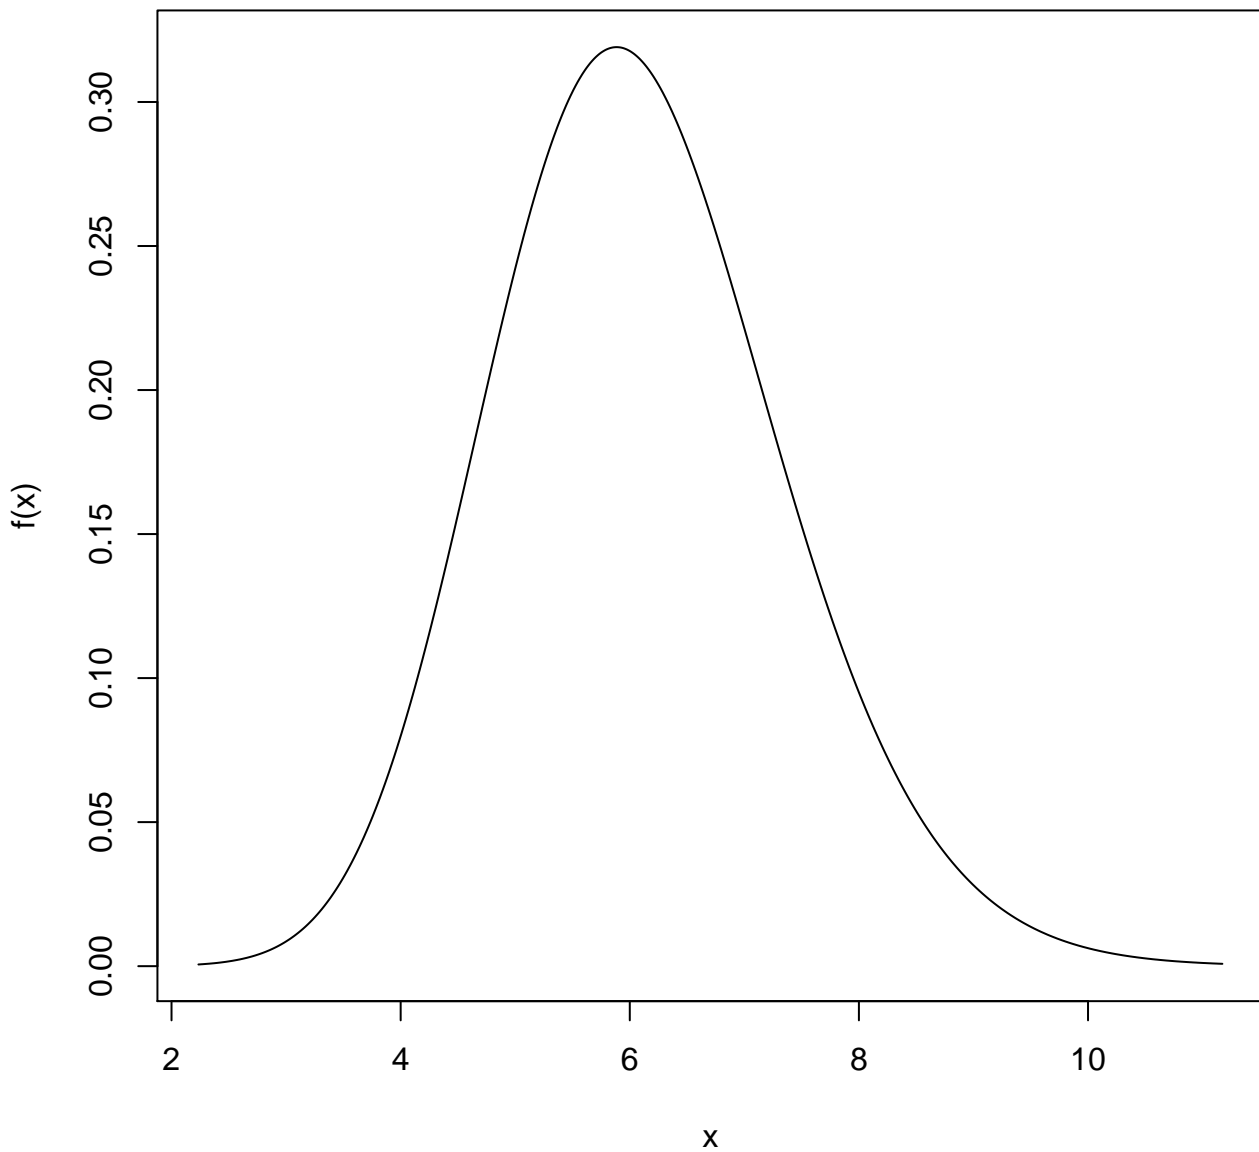

OTC\_L : OTC\_L|tetl

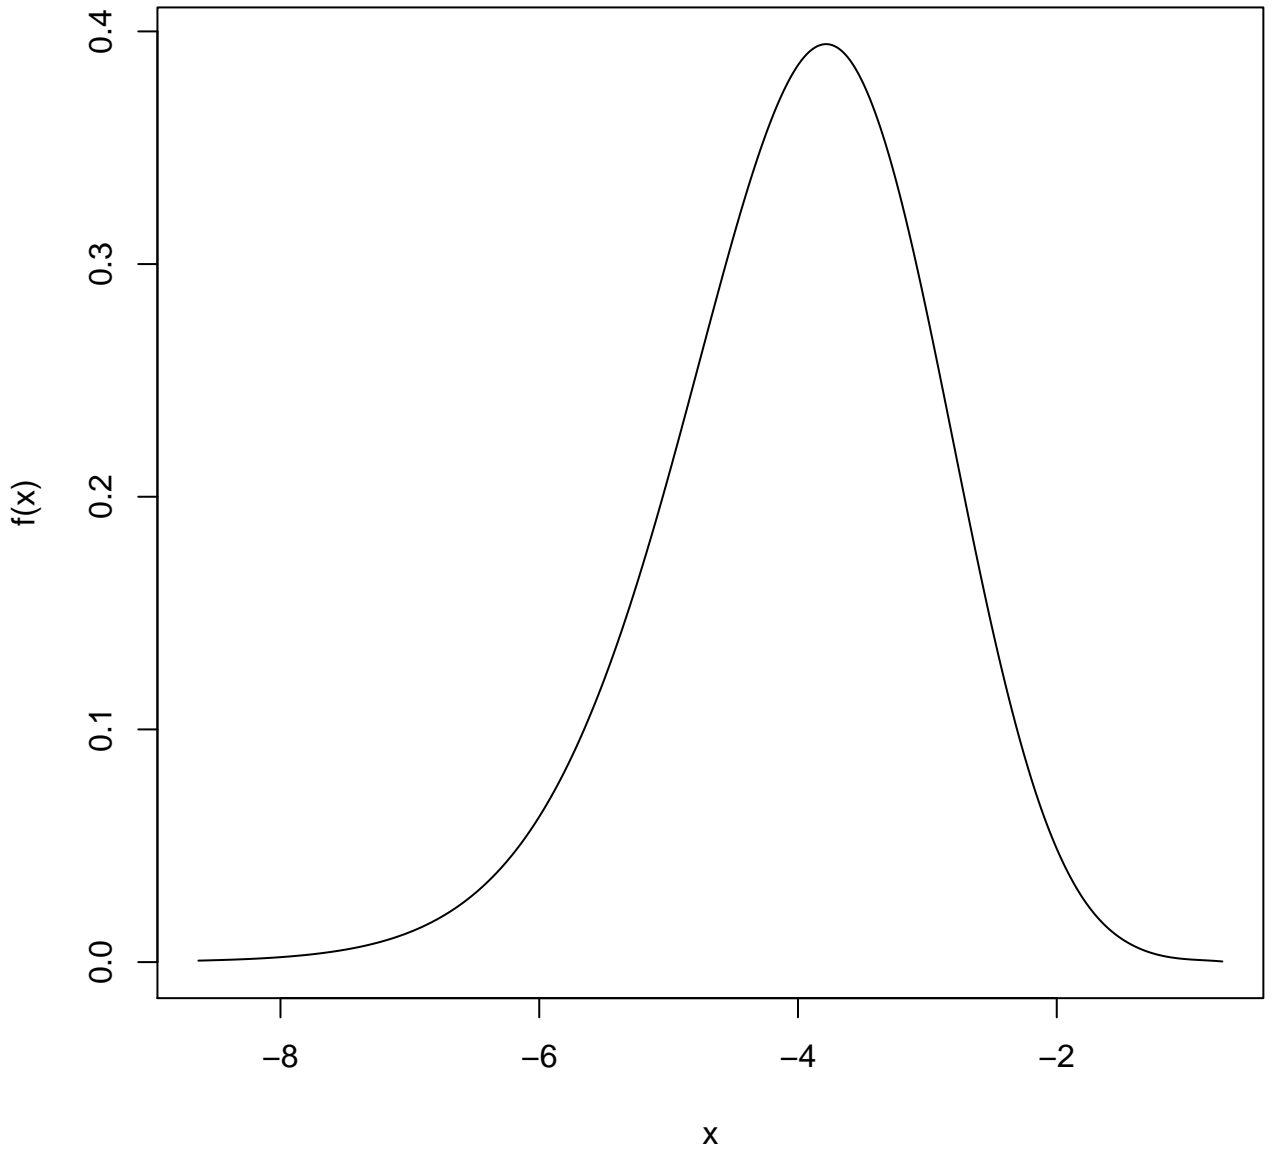



# OTC\_H : OTC\_H|(Intercept)

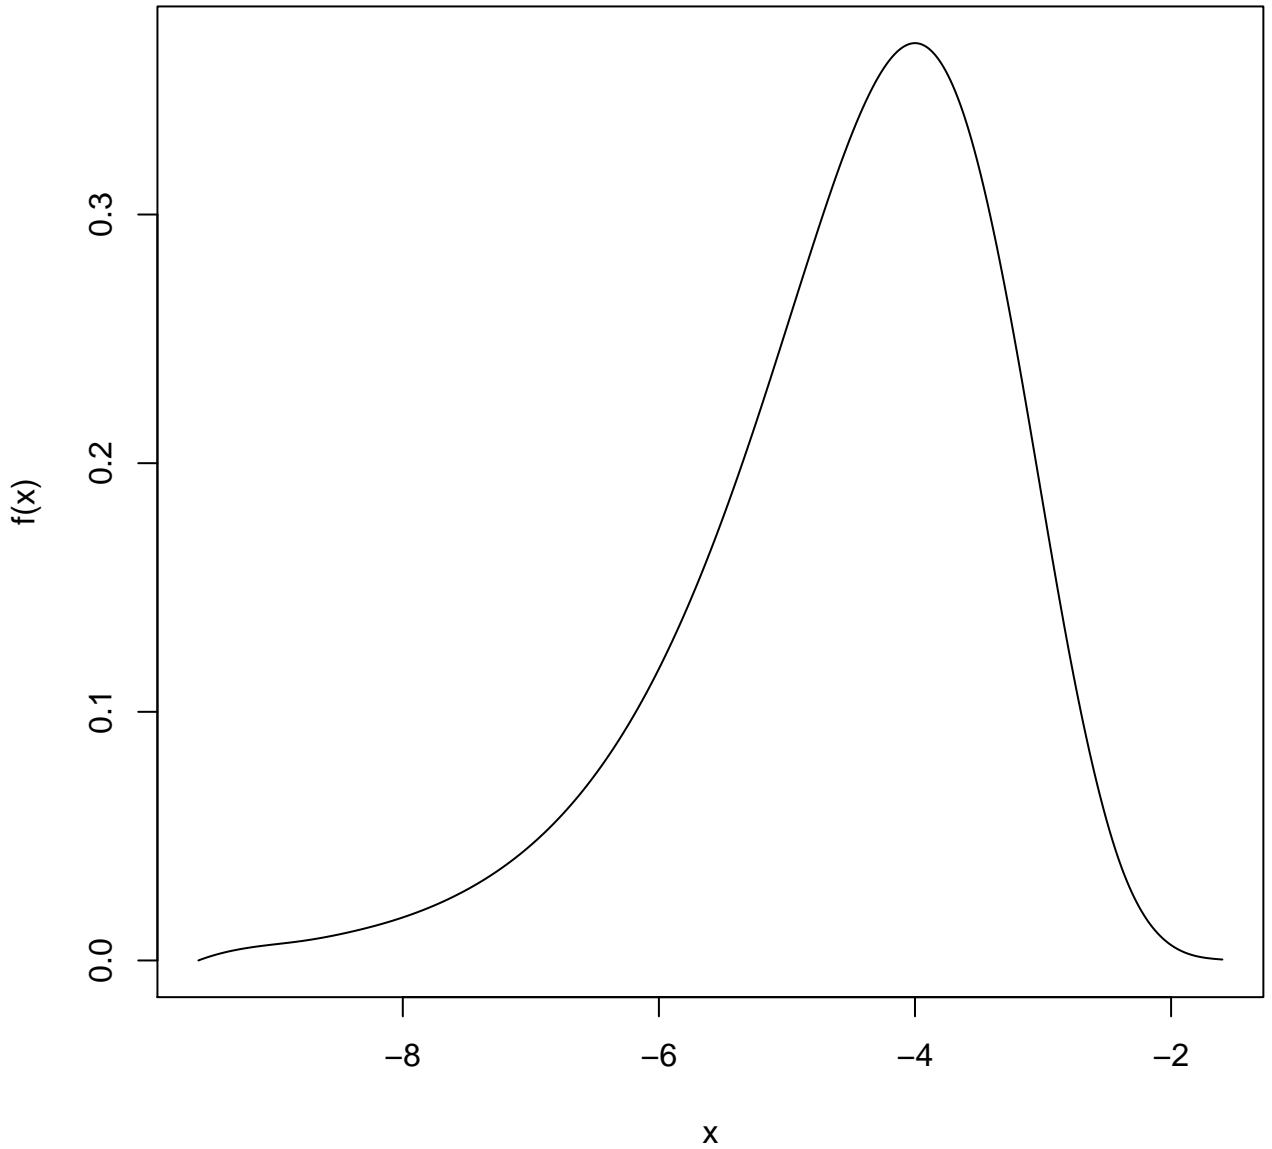

# OTC\_H : OTC\_H|teto

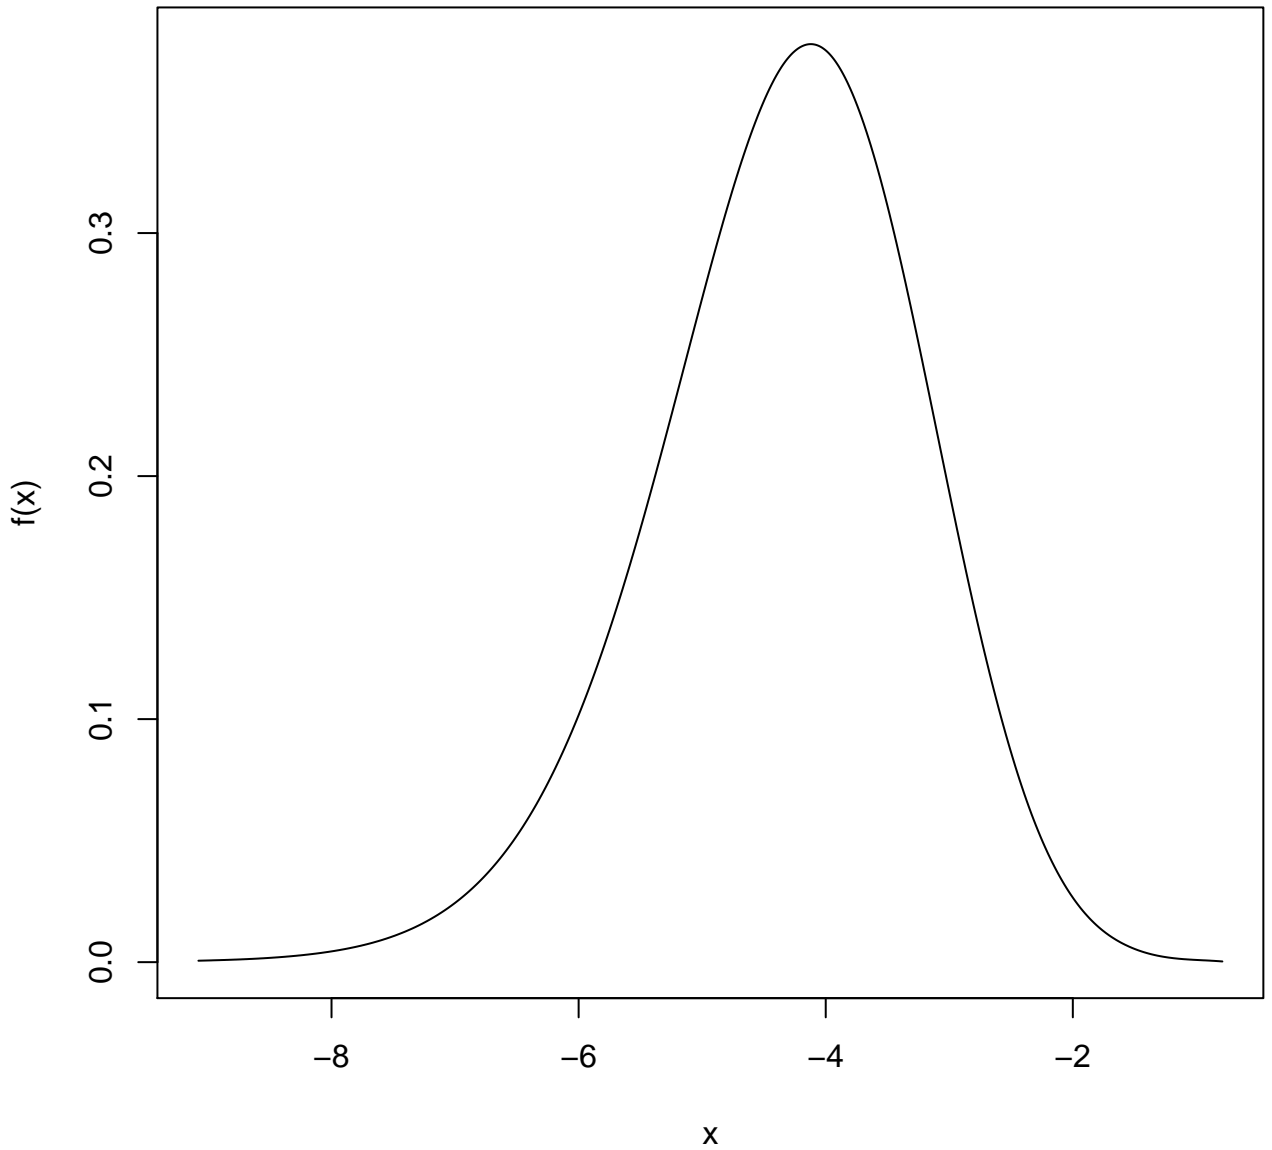

# OTC\_H : OTC\_H|tetl

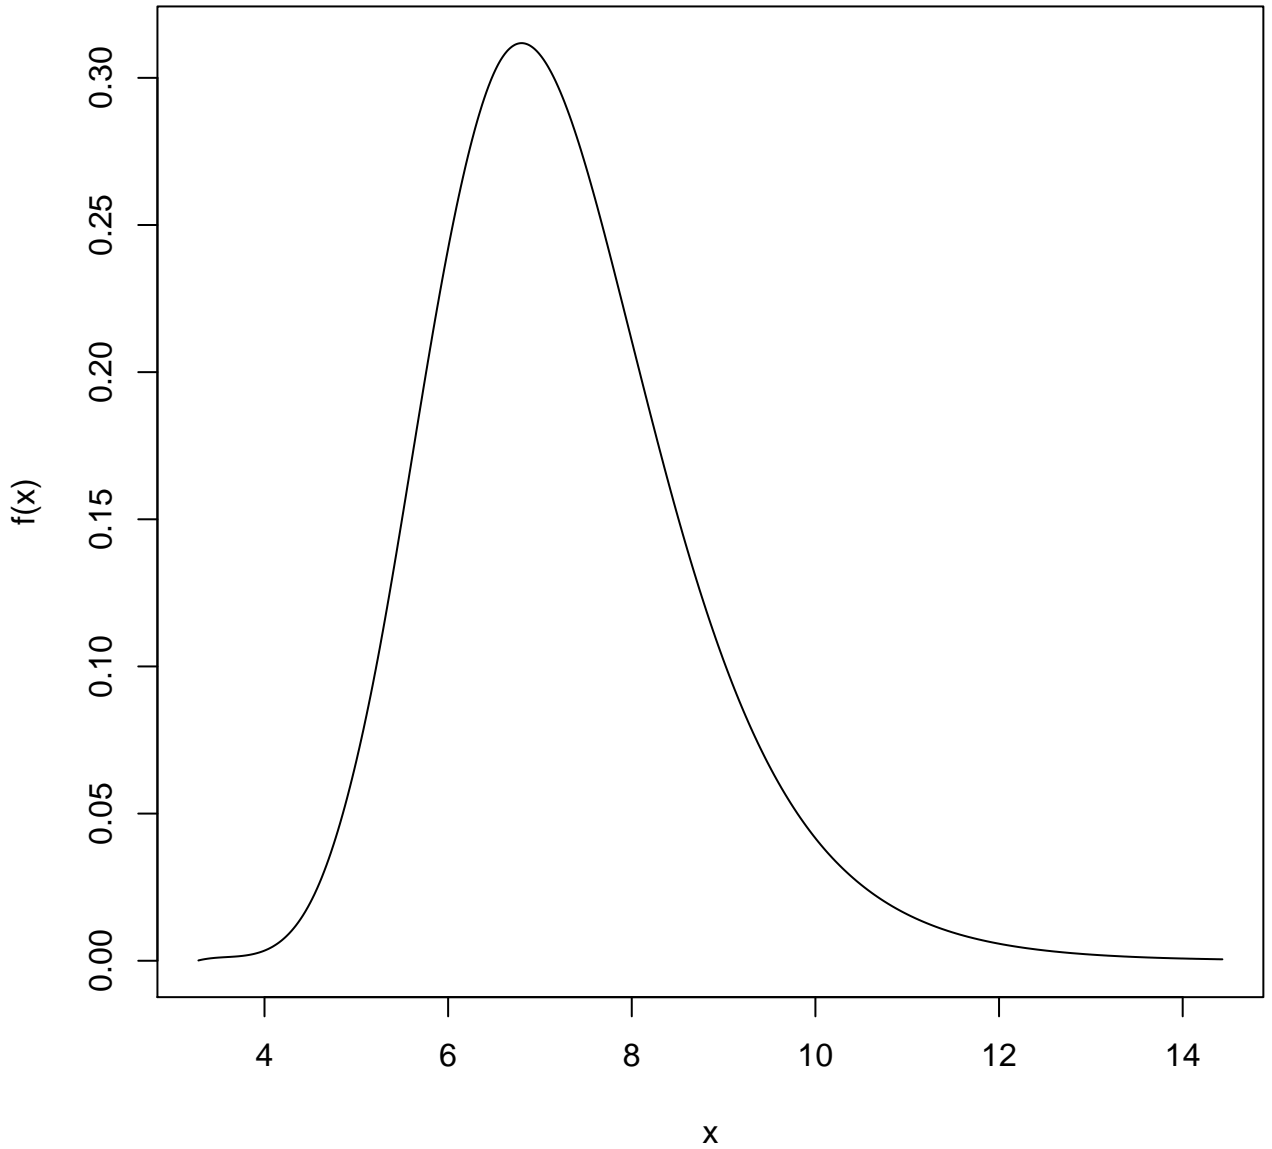

Supplement: pone.0121189.s004.pdf [file pone.0121189.s004.pdf]
